# Supplementary material for: Jak2 and Jaw Muscles Are Required for Mouth Development
Source: Preprints.org preprint supplement (doi:10.20944/preprints202304.0241.v1), 2023-04-12
Supplement: Supplementary file 1 [file supplementary]

## Sheet: all data
392005	392038	392304	392571	392583	392607	392781	392822	393924	395346	394332	394314	394333	394841	394846	395367	1050	2111	250281	250665	251176	254657	257033	258145	258539	258617	260310	260327	262336	264266	264418	265667	266427	266951	267276	267427	269074	269479	270910	277226	277415	277648	280865	280936	281142	281229	290023	291343	291668	292486
AADAT	C6orf118	ABCC5	ANKRD10	AK3	AK3	A2M	ANO9	AK3	ANKRD28			ABHD11	AK3	ACP1	ACER2	BLACE	ARL17B	ACTBL2	A4GNT	ACTB	ADNP2	AK3	USP9X	ABCA7	USP9X	chd7	shh	NIPBL	chd7	CTNND1	CTNND1	EFTUD2	EFTUD2	EXT2	USP9X	NPHP4	ALDH18A1	GPC5	EP300	PAX6	GLI2	STAG2	ACOXL	EFTUD2	EP300	CCDC116	PTEN	POLR1A	EFTUD2
ACSL1	C6orf120	ABCF3	ARHGEF7	CBWD1	CBWD1	A2ML1	AP2A2	CBWD1	ARL8B	ABHD2	ACSL1	AUTS2	CBWD1	ADI1	ADAMTSL1	CNPY1	CRHR1	ADAMTS6	AADAC	ADAP1	ATP9B	CD274		ARHGAP45			bcor									LARP7		ABCC4		GNA14			ANAPC1			FAM246A
ADAM29	CCR6	ACAP2	ATP11A	CD274	CD274	ACRBP	ASCL2	CD274	ARPC4	ACAN	ANKRD37	BAZ1B	CD274	ALLC	AK3	DPP6	KANSL1	AK6	AADACL2	AIMP2	CTDP1	CDC37L1		ARID3A														BIVM					BCL2L11			GGT2
AGA	DACT2	ADIPOQ	CARKD	CDC37L1	CDC37L1	ACSM4	ATHL1	CDC37L1	ATG7	ADAMTS17	C4orf47	BCL7B	CDC37L1	COLEC11	BNC2	EN2	LINC02210-CRHR1	ANKRD55	AGTR1	AMZ1	GALR1	CER1		AZU1														BIVM-ERCC5					BUB1			HIC2
ANKRD37	DLL1	AHSG	CARS2	DMRT1	DMRT1	ADIPOR2	B4GALNT4	DMRT1	ATP2B2	AEN	CASP3	CACNA2D1	DMRT1	DCDC2C	C9orf92	HTR5A	MAPT	C5orf64	ANKUB1	ANKRD61	HSBP1L1	DMAC1		BSG														CCDC168					FBLN7			IGLV1-36
ASB5	ERMARD	ALG3	COL4A1	DMRT2	DMRT2	AEBP2	BET1L	DMRT2	BHLHE40	ALDH1A3	CCDC110	CALN1	DMRT2	FAM110C	CBWD1	HTR5A-AS1	SPPL2C	CCDC125	ARHGEF26	AP5Z1	KCNG2	DMRT1		C2CD4C														CLDN10					MERTK			IGLV1-40
C4orf27	FAM120B	AP2M1	COL4A2	DMRT3	DMRT3	AICDA	BRSK2	DMRT3	BRK1	ANPEP	CDKN2AIP	CCDC146	DMRT3	FAM150B	CCDC171	INSIG1	STH	CCNB1	ARL14	BRAT1	MBP	DMRT2		CDC34														CLYBL					TMEM87B			IGLV1-44
C4orf47	FGFR1OP	APOD	CUL4A	DOCK8	DOCK8	AKAP3	C11orf21	DOCK8	BRPF1	AP3S2	CENPU	CCL24	DOCK8	MYT1L	CD274	PAXIP1	MALL	CCNO	ARMC8	C1GALT1	NFATC1	DMRT3		CFD														DCT					ZC3H8			IGLV1-47
CASP3	FRMD1	ATP13A3	F10	ERMP1	ERMP1	ANO2	C11orf35	ERMP1	BTD	ARRDC4	CLDN22	CCL26	ERMP1	PXDN	CDC37L1	PAXIP1-AS2	MTLN	CD180	ATP1B3	C7orf26	PARD6G	DOCK8		CNN2														DNAJC3								IGLV1-50
CCDC110	GPR31	ATP13A4	F7	FOXD4	FOXD4	APOBEC1	C11orf89	FOXD4	C3orf20	ASB7	CLDN24	CD36	FOXD4	RNASEH1	CER1	RBM33		CDC20B	ATR	C7orf50	RBFA	DOCK8-AS1		ELANE														DOCK9								IGLV1-51
CDKN2AIP	KIF25	ATP13A5	GRTP1	GLDC	GLDC	APOLD1	CD151	GLDC	C3orf83	BLM	CYP4V2	CLDN3	GLDC	RPS7	CNTLN	SHH	NPHP1	CDK7	B3GALNT1	CARD11	SALL3	ERMP1		FGF22														DZIP1								IGLV10-54
CENPU	MLLT4	B3GNT5	ING1	GLIS3	GLIS3	ARHGDIB	CD81	GLIS3	CAMK1	C15orf38	DCTD	CLDN4	GLIS3	SH3YL1	DENND4C	KMT2A		CENPH	BCHE	CCZ1	SLC66A2	FREM1		FSTL3														ERCC5								IGLV11-55
CEP44	MPC1	BCL6	IRS2	IL33	IL33	ART4	CDHR5	IL33	CAND2	CERS3	ENPP6	CLIP2	IL33	SNTG2	DMRT1	ATP1A3		CENPK	C3orf33	CCZ1B	TXNL4A	GLDC		GPX4														FARP1								IGLV2-33
CLCN3	PDCD2	BDH1	LAMP1	INSL4	INSL4	ATF7IP	CEND1	INSL4	CAPN7	CHD2	F11	DNAJC30	INSL4	TMEM18	DMRT2			CWC27	C3orf80	CHST12	ZNF236	GLIS3		GRIN3B														FGF14								IGLV3-32
CLDN22	PDE10A	C3orf70	MCF2L	INSL6	INSL6	ATN1	CHID1	INSL6	CAV3	CHSY1	FAM149A	DTX2	INSL6	TPO	DMRT3			DDX4	CCNL1	COL28A1	ZNF516	IL33		GZMM														GGACT								IGLV4-60
CLDN24	PHF10	CAMK2N2	MYO16	JAK2	JAK2	B4GALNT3	CTSD	JAK2	CCDC174	CIB1	FAT1	EIF4H	JAK2	TRAPPC12	DOCK8			DEPDC1B	CEP70	COX19		INSL4		HCN2														GPC5								IGLV4-69
CYP4V2	PRR18	CCDC50	PCID2	KANK1	KANK1	BCL2L14	DEAF1	KANK1	CHCHD4	CRTC3	FRG1	ELN	KANK1	TSSC1	ERMP1			DHX29	CHST2	CYP2W1		INSL6		KISS1R														GPC6								IGLV5-37
DCTD	PSMB1	CEP19	PROZ	KCNV2	KCNV2	C12orf4	DRD4	KCNV2	CHL1	DET1	FRG2	FGL2	KCNV2		FAM154A			DIMT1	CLDN18	CYTH3		JAK2		MADCAM1														GPR18								IGLV5-45
ENPP6	RNASET2	CHRD	RAB20	KDM4C	KDM4C	C12orf5	DUSP8	KDM4C	CIDEC	FAM169B	HELT	FKBP6	KDM4C		FOXD4			ELOVL7	CLRN1	DAGLB		KANK1		MED16														GPR180								IGLV5-48
F11	RPS6KA2	CLCN2	SOX1	KIAA0020	KIAA0020	C12orf57	EFCAB4A	KIAA0020	CNTN4	FAM174B	ING2	FZD9	KIAA0020		FREM1			ERBIN	CLSTN2	DNAAF5		KCNV2		MIER2														GPR183								IGLV5-52
FAM149A	SDIM1	CLDN1	SPACA7	KIAA1432	KIAA1432	C12orf60	EPS8L2	KIAA1432	CNTN6	FANCI	IRF2	GATSL1	KIAA1432		GLDC			ERCC8	COMMD2	EIF2AK1		KDM4C		MISP														HS6ST3								IGLV6-57
FAT1	SFT2D1	CLDN16	TEX29	KIAA2026	KIAA2026	C1R	HRAS	KIAA2026	COLQ	FES	KIAA1430	GATSL2	KIAA2026		GLIS3			ESM1	COPB2	EIF3B		KIAA2026		ODF3L2														IPO5								IGLV7-43
FBXO8	SMOC2	CPN2	TUBGCP3	MLANA	MLANA	C1RL	IFITM1	MLANA	CPNE9	FURIN	KLKB1	GNAI1	LURAP1L		HAUS6			GAPT	CP	ELFN1		LURAP1L		PALM														ITGBL1								IGLV7-46
FRG1	T	CRYGS		PDCD1LG2	PDCD1LG2	C1S	IFITM10	PDCD1LG2	CRBN	GDPGP1	LRP2BP	GNAT3	MLANA		IL33			GPBP1	CPA3	FAM20C		MLANA		PLPP2														MBNL2								IGLV8-61
FRG2	TBP	DGKG		PLGRKT	PLGRKT	C3AR1	IFITM2	PLGRKT	CRELD1	HAPLN3	MTNR1A	GSAP	MPDZ		INSL4			GPX8	CPB1	FAM220A		MPDZ		PLPPR3														METTL21C								IGLV9-49
GALNT7	TCP10	DLG1		PPAPDC2	PPAPDC2	CACNA1C	IFITM3	PPAPDC2	DPH3	HDDC3	PDLIM3	GTF2I	NFIB		INSL6			GTF2H2	DBR1	FBXL18		NFIB		POLR2E														NALCN								MAPK1
GALNTL6	TCP10L2	DNAJB11		PTPRD	PTPRD	CACNA2D4	IFITM5	PTPRD	EAF1	IDH2	PRIMPOL	GTF2IRD1	PDCD1LG2		JAK2			GTF2H2C	DHX36	FOXK1		PDCD1LG2		POLRMT														OXGR1								PPIL2
GLRA3	TCTE3	DVL3		RANBP6	RANBP6	CAPZA3	IGF2	RANBP6	EDEM1	IGF1R	RWDD4	GTF2IRD2	PLGRKT		KANK1			GZMA	DIPK2A	FOXL3		PLGRKT		PRSS57														PCCA								PPM1F
GPM6A	THBS2	ECE2		RCL1	RCL1	CCDC77	INS	RCL1	EMC3	IQGAP1	SLC25A4	GTF2IRD2B	PPAPDC2		KCNV2			GZMK	DZIP1L	FSCN1		PLPP6		PRTN3														POGLUT2								PRAME
HAND2	TTLL2	EHHADH		RFX3	RFX3	CCND2	IRF7	RFX3	FANCD2	ISG20	SNX25	HGF	PTPRD		KDM4C			HTR1A	EIF2A	GET4		PSIP1		PTBP1														RAP2A								RIMBP3B
HELT	UNC93A	EIF2B5		RLN1	RLN1	CD163	KCNQ1	RLN1	FANCD2OS	KIF7	SORBS2	HIP1	RANBP6		KIAA0020			IL31RA	ERICH6	GLCCI1		PTPRD		R3HDM4														RNF113B								RIMBP3C
HMGB2	WDR27	EIF4A2		RLN2	RLN2	CD163L1	KRTAP5-1	RLN2	FBLN2	LINS	STOX2	HSPB1	RCL1		KIAA1432			IL6ST	ESYT3	GNA12		PUM3		RNF126														SLC10A2								SDF2L1
HPGD		EIF4G1		SLC1A1	SLC1A1	CD27	KRTAP5-2	SLC1A1	FGD5	LRRC28	TENM3	LAT2	RFX3		KIAA2026				FAIM	GPER1		RANBP6		SBNO2														SLC15A1								TMEM191C
ING2		EPHB3		SMARCA2	SMARCA2	CD4	KRTAP5-3	SMARCA2	GALNT15	LRRK1	TLR3	LIMK1	RLN1		LURAP1L			IPO11	FOXL2	GPR146		RCL1		SHC2														SOX21								TOP3B
IRF2		ETV5		SPATA6L	SPATA6L	CD69	KRTAP5-4	SPATA6L	GHRL	LYSMD4	TRAPPC11	MAGI2	RLN2		MLANA			KIF2A	FOXL2NB	GRID2IP		RFX3		THEG														STK24								UBE2L3
KIAA1430		FAM131A		TMEM261	TMEM261	CD9	KRTAP5-5	TMEM261	GRIP2	MAN2A2	TRIML1	MDH2	SLC1A1		MPDZ			LRRC70	GFM1	GRIFIN		RIC1		TMEM259														TEX30								VPREB1
KLKB1		FAM43A		TPD52L3	TPD52L3	CDCA3	KRTAP5-6	TPD52L3	GRM7	MCTP2	TRIML2	MLXIPL	SMARCA2		NFIB			MAP3K1		ICA1		RLN1		TPGS1														TGDS								YDJC
LRP2BP		FBXO45		UHRF2	UHRF2	CDKN1B	LRRC56	UHRF2	HACL1	MEF2A	UFSP2	NCF1	SPATA6L		PDCD1LG2			MARVELD2	GK5	INTS1		RLN2		WDR18														TM9SF2								YPEL1
MFAP3L		FETUB		VLDLR	VLDLR	CHD4	LSP1	VLDLR	HDAC11	MESP1	WWC2	NSUN5	TMEM261		PLGRKT				GMPS	IQCE		SLC1A1																TMTC4								ZNF280A
MTNR1A		FGF12				CLEC12A	MOB2		HRH1	MESP2	ZFP42	PCLO	TPD52L3		PLIN2			MAST4	GPR149	KDELR2		SMARCA2																TPP2								ZNF280B
NEIL3		FYTTD1				CLEC12B	MRPL23		IL17RC	MFGE8		PHTF2	TYRP1		PPAPDC2			MCIDAS	GPR171	LFNG																		UBAC2
NEK1		GMNC				CLEC1A	MUC2		IL17RE	MRPL46		POM121	UHRF2		PSIP1			MIER3	GPR87	MAD1L1		SNAPC3																UGGT2
PDLIM3		GP5				CLEC1B	MUC5AC		IL5RA	MRPS11		POM121C	VLDLR		PTPRD			MRPS36	GRK7	MAFK		SPATA6L																ZIC2
PRIMPOL		HES1				CLEC2A	MUC5B		IQSEC1	NGRN		POMZP3			RANBP6			MTREX	GYG1	MICALL2		TPD52L3																ZIC5
RWDD4		HRASLS				CLEC2B	MUC6		IRAK2	NR2F2		POR			RCL1			NAIP	HLTF	MIOS		TTC39B
SAP30		HRG				CLEC2D	NLRP6		ITPR1	OR4F15		PTPN12			RFX3			NDUFAF2	HPS3	MMD2		TYRP1
SCRG1		HTR3C				CLEC4A	ODF3		JAGN1	OR4F6		RFC2			RLN1			NLN	IGSF10	MRM2		UHRF2
SLC25A4		HTR3D				CLEC4C	PDDC1		LHFPL4	PCSK6		RHBDD2			RLN2			OCLN	IL12A	NUDT1		VLDLR
SNX25		HTR3E				CLEC4D	PHRF1		LMCD1	PEX11A		RSBN1L			RPS6			PDE4D	IQCJ	NXPH1		ZDHHC21
SORBS2		IGF2BP2				CLEC4E	PIDD		LRRN1	PGPEP1L		SEMA3A			RRAGA			PIK3R1	IQCJ-SCHIP1	OCM
SPATA4		IL1RAP				CLEC6A	PKP3		LSM3	PLIN1		SEMA3C			SH3GL2			PLK2	KCNAB1	PAPOLB
SPCS3		IQCG				CLEC7A	PNPLA2		METTL6	POLG		SEMA3D			SLC1A1			PLPP1	KPNA4	PDGFA
STOX2		KIAA0226				CLEC9A	POLR2L		MKRN2	PRC1		SEMA3E			SLC24A2			PPWD1	LEKR1	PMS2
TENM3		KLHL24				CLECL1	PSMD13		MRPS25	RCCD1		SRCRB4D			SMARCA2			RAB3C	LINC01100	PRKAR1B
TLR3		KLHL6				CLSTN3	PTDSS2		MTMR14	RGMA		SRRM3			SNAPC3			RAD17	LINC02877	PSMG3
TRAPPC11		KNG1				COPS7A	RASSF7		NR2C2	RHCG		STX1A			SPATA6L			RGS7BP	LXN	RAC1
TRIML1		LAMP3				CREBL2	RIC8A		NUP210	RLBP1		STYXL1			TMEM261			RNF180	MBNL1	RADIL
TRIML2		LEPREL1				DCP1B	RNH1		OGG1	SEMA4B		TBL2			TPD52L3			SERF1A	MED12L	RBAK
UFSP2		LIPH				DDX47	RPLP2		OXNAD1	SLCO3A1		TMEM120A			TTC39B			SERF1B	MFSD1	RBAK-RBAKDN
VEGFC		LMLN				DERA	SCGB1C1		OXTR	SNRPA1		TMEM60			TYRP1			SETD9	MINDY4B	RNF216
WDR17		LPP				DPPA3	SCT		PPARG	ST8SIA2		TRIM50			UHRF2			SGTB	MLF1	RPA3
WWC2		LRCH3				DUSP16	SIGIRR		PRRT3	SV2B		TRIM73			VLDLR			SHISAL2B	MME	RSPH10B
ZFP42		LRRC15				DYRK4	SIRT3		RAD18	SYNM		TRIM74			ZDHHC21			SHLD3	MRAS	RSPH10B2
		LSG1				EFCAB4B	SLC25A22		RAF1	TARSL2		TYW1B						SLC30A5	MRPS22	SDK1
		MAGEF1				EMG1	SYT8		RFTN1	TICRR		UPK3B						SLC38A9	NMD3	SLC29A4
		MAP3K13				EMP1	TALDO1		RPL32	TM2D3		VPS37D						SMIM15	NME9	SNX8
		MAP6D1				ENO2	TH		RPUSD3	TTC23		WBSCR16						SMN1	NMNAT3	SUN1
		MASP1				EPS8	TMEM80		SEC13	UNC45A		WBSCR17						SMN2	OTOL1	TMEM184A
		MB21D2				ERC1	TNNI2		SETD5	VIMP		WBSCR22						SREK1	P2RY1	TNRC18
		MCCC1				ERP27	TNNT3		SETMAR	VPS33B		WBSCR27						SREK1IP1	P2RY12	TTYH3
		MCF2L2				ETV6	TOLLIP		SH3BP5	WDR93		WBSCR28						TAF9	P2RY13	UMAD1
		MFI2				FAM90A1	TRPM5		SLC6A1	ZNF710		YWHAG						TRAPPC13	P2RY14	UNCX
		MUC20				FBXL14	TSPAN32		SLC6A11	ZNF774		ZP3						TRIM23	PAQR9	USP42
		MUC4				FGF23	TSPAN4		SLC6A6									ZSWIM6	PCOLCE2	WIPI2
		NCBP2				FGF6	TSSC4		SRGAP3										PDCD10	ZDHHC4
		NCBP2-AS2				FKBP4			SSUH2										PFN2	ZFAND2A
		NRROS				FOXJ2			SUMF1										PIK3CB	ZNF12
		OPA1				FOXM1			SYN2										PLCH1	ZNF316
		OSTN				GABARAPL1			TADA3										PLOD2	ZNF853
		PAK2				GALNT8			TAMM41										PLS1
		PARL				GAPDH			TATDN2										PLSCR1
		PCYT1A				GDF3			THUMPD3										PLSCR2
		PIGX				GNB3			TIMP4										PLSCR4
		PIGZ				GPR162			TMEM40										PLSCR5
		POLR2H				GPR19			TMEM43										PPM1L
		PPP1R2				GPRC5A			TRNT1										PRR23A
		PSMD2				GPRC5D			TSEN2										PRR23B
		PYDC2				GRIN2B			TTLL3										PRR23C
		RFC4				GSG1			VGLL4										PTX3
		RNF168				GUCY2C			VHL										PXYLP1
		RPL35A				H2AFJ			WNT7A										RAP2B
		RPL39L				HEBP1			XPC										RARRES1
		RTP1				HIST4H4			ZFYVE20										RASA2
		RTP2				IFFO1													RBP1
		RTP4				ING4													RBP2
		SENP2				IQSEC3													RNF13
		SENP5				ITFG2													RNF7
		SLC51A				KCNA1													RSRC1
		SMCO1				KCNA5													SCHIP1
		SST				KCNA6													SELENOT
		ST6GAL1				KDM5A													SERP1
		TBCCD1				KIAA1467													SERPINI1
		TCTEX1D2				KLRB1													SERPINI2
		TFRC				KLRC1													SHOX2
		THPO				KLRC2													SI
		TM4SF19				KLRC3													SIAH2
		TMEM207				KLRC4													SLC25A36
		TMEM41A				KLRD1													SLC33A1
		TMEM44				KLRF1													SLC66A1L
		TNK2				KLRF2													SLC9A9
		TP63				KLRG1													SLITRK3
		TPRG1				KLRK1													SMC4
		TRA2B				LAG3													SPSB4
		UBXN7				LEPREL2													SPTSSB
		UTS2B				LMO3													SSR3
		VPS8				LOH12CR1													STRIT1
		VWA5B2				LPAR5													SUCNR1
		WDR53				LPCAT3													TFDP2
		XXYLT1				LRP6													TIPARP
		YEATS2				LRRC23													TM4SF1
		ZDHHC19				LRTM2													TM4SF18
						LTBR													TM4SF4
						M6PR													TMEM14EP
						MAGOHB													TRIM42
						MANSC1													TRIM59
						MFAP5													TRPC1
						MGP													TSC22D2
						MGST1													U2SURP
						MLF2													VEPH1
						MRPL51													WDR49
						NANOG													WWTR1
						NANOGNB													XRN1
						NCAPD2													ZBBX
						NDUFA9													ZBTB38
						NECAP1													ZIC1
						NINJ2													ZIC4
						NOP2
						NRIP2
						NTF3
						OLR1
						PARP11
						PDE3A
						PDE6H
						PEX5
						PHB2
						PHC1
						PIANP
						PIK3C2G
						PLBD1
						PLCZ1
						PLEKHA5
						PLEKHG6
						PRB1
						PRB2
						PRB3
						PRB4
						PRH1
						PRH2
						PRMT8
						PRR4
						PTMS
						PTPN6
						PTPRO
						PZP
						RAD51AP1
						RAD52
						RBP5
						RERG
						RERGL
						RHNO1
						RIMKLB
						SCNN1A
						SLC15A5
						SLC2A14
						SLC2A3
						SLC6A12
						SLC6A13
						SLCO1B1
						SLCO1B3
						SLCO1B7
						SLCO1C1
						SMCO3
						SPSB2
						STRAP
						STYK1
						TAPBPL
						TAS2R10
						TAS2R13
						TAS2R14
						TAS2R19
						TAS2R20
						TAS2R30
						TAS2R31
						TAS2R42
						TAS2R43
						TAS2R46
						TAS2R50
						TAS2R7
						TAS2R8
						TAS2R9
						TEAD4
						TMEM52B
						TNFRSF1A
						TPI1
						TSPAN9
						TULP3
						USP5
						VAMP1
						VWF
						WBP11
						WNK1
						WNT5B
						YBX3
						ZNF384
						ZNF705A
[truncated: 34 more columns]

## Sheet: all patient IDs
Patient ID
392005		83 patients
392038
392304
392571
392583
392607
392781
392822
393924
395346
394332
394314
394333
394841
394846
395367
1050
2111
250281
250665
251176
254657
257033
258145
258539
258617
260310
260327
262336
264266
264418
265667
266427
266951
267276
267427
269074
269479
270910
277226
277415
277648
280865
280936
281142
281229
290023
291343
291668
292486
292580
294256
295289
295695
301592
304755
305524
389940
391169
391988
392614
395127
395621
395945
396369
396505
396515
396771
396795
396807
396811
397332
398080
398082
398353
398366
398377
399101
399134
400815
400850
401271
411551

## Sheet: All Affected Genes List
All Genes	All genes with repeats removed
A2M	A2M
A2ML1	A2ML1
A4GNT	A4GNT
AACS	AACS
AADAC	AADAC
AADACL2	AADACL2
ABCA2	ABCA2
ABCA7	ABCA7
ABCB5	ABCB5
ABCB8	ABCB8
ABCB8	ABCB9
ABCB8	ABCC4
ABCB8	ABCF2
ABCB9	ABCF2-H2BE1
ABCC4	ABHD11
ABCF2	ABHD2
ABCF2	ABLIM2
ABCF2	ACADS
ABCF2	ACAN
ABCF2-H2BE1	ACAP2
ABCF2-H2BE1	ACAT2
ABCF2-H2BE1	ACER2
ABCF2-H2BE1	ACOX3
ABHD11	ACOXL
ABHD2	ACP1
ABLIM2	ACRBP
ACADS	ACSL1
ACAN	ACSM4
ACAP2	ACTB
ACAT2	ACTBL2
ACER2	ACTR3B
ACER2	ACTR3C
ACER2	ADA2
ACOX3	ADAMTS17
ACOXL	ADAMTS6
ACP1	ADAMTSL1
ACRBP	ADAP1
ACSL1	ADCK2
ACSM4	ADCYAP1
ACTB	ADD1
ACTBL2	ADGRD1
ACTR3B	ADI1
ACTR3B	ADIPOQ
ACTR3B	ADIPOR2
ACTR3B	ADNP2
ACTR3C	ADORA2A
ACTR3C	ADRA2C
ACTR3C	AEBP2
ACTR3C	AEN
ADA2	AFAP1
ADAMTS17	AFDN
ADAMTS6	AFG3L2
ADAMTSL1	AGAP3
ADAMTSL1	AGK
ADAMTSL1	AGMO
ADAP1	AGPAT2
ADCK2	AGPAT4
ADCYAP1	AGR2
ADCYAP1	AGR3
ADCYAP1	AGTR1
ADCYAP1	AHR
ADD1	AHSG
ADGRD1	AICDA
ADI1	AIFM3
ADIPOQ	AIMP2
ADIPOR2	AJM1
ADNP2	AK3
ADNP2	AK6
ADORA2A	AKAIN1
ADORA2A	AKAP12
ADORA2A	AKAP3
ADORA2A	ALDH18A1
ADORA2A	ALDH1A3
ADRA2C	ALLC
AEBP2	AMER1
AEN	AMZ1
AFAP1	ANAPC1
AFDN	ANAPC2
AFG3L2	ANAPC5
AFG3L2	ANKLE2
AFG3L2	ANKMY2
AGAP3	ANKRD12
AGAP3	ANKRD28
AGAP3	ANKRD30B
AGAP3	ANKRD37
AGK	ANKRD55
AGMO	ANKRD61
AGPAT2	ANKRD62
AGPAT4	ANKUB1
AGR2	ANO2
AGR3	ANO9
AGTR1	ANPEP
AHR	AOC1
AHSG	AP2A2
AICDA	AP3S2
AIFM3	AP5Z1
AIFM3	APCDD1
AIFM3	APOBEC1
AIFM3	APOD
AIFM3	APOLD1
AIMP2	ARHGAP28
AJM1	ARHGAP45
AK3	ARHGDIB
AK3	ARHGEF26
AK3	ARHGEF35
AK3	ARHGEF5
AK3	ARID1B
AK3	ARID3A
AK3	ARL14
AK3	ARL17B
AK6	ARL4A
AKAIN1	ARL6IP4
AKAIN1	ARL8B
AKAIN1	ARMC8
AKAIN1	ARMT1
AKAP12	ARPC4
AKAP3	ARRDC1
ALDH18A1	ARRDC1-AS1
ALDH1A3	ARRDC4
ALLC	ART4
AMER1	ARVCF
AMZ1	ASB10
ANAPC1	ASB7
ANAPC2	ASCL2
ANAPC5	ASIC3
ANKLE2	ATF7IP
ANKMY2	ATG7
ANKRD12	ATG9B
ANKRD12	ATHL1
ANKRD12	ATN1
ANKRD28	ATP13A3
ANKRD30B	ATP13A4
ANKRD30B	ATP13A5
ANKRD30B	ATP1A3
ANKRD37	ATP1B3
ANKRD55	ATP2B2
ANKRD61	ATP5ME
ANKRD62	ATP6V0A2
ANKRD62	ATP6V0A4
ANKRD62	ATP6V0E2
ANKUB1	ATP6V1E1
ANO2	ATP9B
ANO9	ATR
ANPEP	AUTS2
AOC1	AZU1
AOC1	B3GALNT1
AOC1	B3GNT4
AOC1	B4GALNT3
AP2A2	B4GALNT4
AP3S2	BAZ1B
AP5Z1	BCHE
APCDD1	BCL2L11
APCDD1	BCL2L13
APCDD1	BCL2L14
APOBEC1	BCL6
APOD	BCL7A
APOLD1	BCL7B
ARHGAP28	BCOR
ARHGAP28	BCR
ARHGAP28	BDH1
ARHGAP28	BET1L
ARHGAP45	BHLHE40
ARHGDIB	BID
ARHGEF26	BIVM
ARHGEF35	BIVM-ERCC5
ARHGEF5	BLACE
ARID1B	BLM
ARID3A	BLOC1S4
ARL14	BLOC1S5
ARL17B	BLOC1S5-TXNDC5
ARL4A	BMP6
ARL6IP4	BNC2
ARL8B	BPHL
ARMC8	BRAF
ARMT1	BRAT1
ARPC4	BRI3BP
ARRDC1	BRK1
ARRDC1-AS1	BRPF1
ARRDC4	BRSK2
ART4	BSG
ARVCF	BTD
ARVCF	BUB1
ARVCF	BZW2
ARVCF	C11ORF21
ARVCF	C11ORF35
ASB10	C11ORF89
ASB10	C12ORF4
ASB10	C12ORF43
ASB10	C12ORF5
ASB7	C12ORF57
ASCL2	C12ORF60
ASIC3	C12ORF65
ASIC3	C15ORF38
ASIC3	C1GALT1
ASIC3	C1R
ATF7IP	C1RL
ATG7	C1S
ATG9B	C22ORF15
ATG9B	C22ORF39
ATG9B	C2CD4C
ATG9B	C3AR1
ATHL1	C3ORF20
ATN1	C3ORF33
ATP13A3	C3ORF80
ATP13A4	C3ORF83
ATP13A5	C4ORF47
ATP1A3	C4ORF48
ATP1B3	C4ORF50
ATP2B2	C5ORF64
ATP5ME	C6ORF118
ATP6V0A2	C6ORF120
ATP6V0A4	C6ORF201
ATP6V0E2	C6ORF99
ATP6V0E2	C7ORF26
ATP6V0E2	C7ORF31
ATP6V0E2	C7ORF33
ATP6V1E1	C7ORF50
ATP6V1E1	C8G
ATP6V1E1	C9ORF116
ATP6V1E1	C9ORF139
ATP6V1E1	C9ORF163
ATP9B	C9ORF62
ATP9B	C9ORF92
ATR	CABIN1
AUTS2	CABP1
AZU1	CACNA1B
B3GALNT1	CACNA1C
B3GNT4	CACNA2D1
B4GALNT3	CACNA2D4
B4GALNT4	CAGE1
BAZ1B	CALN1
BCHE	CAMK1
BCL2L11	CAMKK2
BCL2L13	CAMSAP1
BCL2L13	CAND2
BCL2L13	CAPN7
BCL2L13	CAPZA3
BCL2L13	CARD11
BCL2L14	CARD9
BCL6	CASP2
BCL7A	CASP3
BCL7B	CAV3
bcor	CBWD1
BCR	CBX3
BCR	CCDC110
BCR	CCDC116
BCR	CCDC125
BCR	CCDC126
BDH1	CCDC146
BET1L	CCDC168
BHLHE40	CCDC170
BID	CCDC171
BID	CCDC174
BID	CCDC183
BID	CCDC187
BID	CCDC188
BIVM	CCDC50
BIVM-ERCC5	CCDC62
BLACE	CCDC77
BLACE	CCDC92
BLACE	CCDC96
BLACE	CCL24
BLACE	CCL26
BLM	CCNB1
BLOC1S4	CCND2
BLOC1S5	CCNL1
BLOC1S5-TXNDC5	CCNO
BMP6	CCR6
BNC2	CCT8L2
BNC2	CCZ1
BNC2	CCZ1B
BPHL	CD151
BRAF	CD163
BRAT1	CD163L1
BRI3BP	CD180
BRK1	CD27
BRPF1	CD274
BRSK2	CD36
BSG	CD4
BTD	CD69
BUB1	CD81
BZW2	CD9
C11orf21	CDC20B
C11orf35	CDC34
C11orf89	CDC37L1
C12orf4	CDC45
C12orf43	CDCA3
C12orf5	CDCA7L
C12orf57	CDHR5
C12orf60	CDK2AP1
C12orf65	CDK5
C15orf38	CDK7
C1GALT1	CDKN1B
C1GALT1	CDKN2AIP
C1R	CDYL
C1RL	CECR2
C1S	CEND1
C22orf15	CENPH
C22orf15	CENPK
C22orf15	CENPU
C22orf15	CEP19
C22orf15	CEP192
C22orf39	CEP43
C22orf39	CEP70
C22orf39	CEP76
C22orf39	CER1
C22orf39	CERS3
C2CD4C	CETN1
C3AR1	CFAP251
C3orf20	CFAP99
C3orf33	CFD
C3orf80	CHCHD10
C3orf83	CHCHD4
C4orf47	CHD2
C4orf48	CHD4
C4orf50	CHD7
C5orf64	CHFR
C6orf118	CHID1
C6orf120	CHL1
C6orf201	CHMP1B
C6orf99	CHN2
C7orf26	CHPF2
C7orf31	CHST12
C7orf33	CHST2
C7orf33	CHSY1
C7orf33	CIB1
C7orf33	CIDEA
C7orf50	CIDEC
C8G	CLCN1
C9orf116	CLDN1
C9orf139	CLDN10
C9orf163	CLDN16
C9orf62	CLDN18
C9orf92	CLDN20
C9orf92	CLDN22
C9orf92	CLDN24
CABIN1	CLDN3
CABIN1	CLDN4
CABIN1	CLDN5
CABIN1	CLEC12A
CABIN1	CLEC12B
CABP1	CLEC1A
CACNA1B	CLEC1B
CACNA1C	CLEC2A
CACNA2D1	CLEC2B
CACNA2D4	CLEC2D
CAGE1	CLEC2L
CALN1	CLEC4A
CAMK1	CLEC4C
CAMKK2	CLEC4D
CAMSAP1	CLEC4E
CAND2	CLEC5A
CAPN7	CLEC6A
CAPZA3	CLEC7A
CARD11	CLEC9A
CARD9	CLECL1
CASP2	CLIC3
CASP3	CLIP1
CAV3	CLIP2
CBWD1	CLNK
CBWD1	CLRN1
CBWD1	CLSTN2
CBWD1	CLSTN3
CBWD1	CLTCL1
CBWD1	CLUL1
CBWD1	CLYBL
CBWD1	CNKSR3
CBX3	CNN2
CCDC110	CNPY1
CCDC116	CNTLN
CCDC116	CNTN4
CCDC116	CNTN6
CCDC116	CNTNAP2
CCDC116	COL28A1
CCDC116	COL5A1
CCDC125	COLEC11
CCDC126	COLEC12
CCDC146	COLQ
CCDC168	COMMD2
CCDC170	COMT
CCDC171	COPB2
CCDC171	COPS7A
CCDC171	COQ5
CCDC174	COX19
CCDC183	COX6A1
CCDC187	CP
CCDC188	CPA3
CCDC188	CPB1
CCDC188	CPLX1
CCDC188	CPN2
CCDC188	CPNE9
CCDC50	CPVL
CCDC62	CPZ
CCDC77	CRBN
CCDC92	CREB5
CCDC96	CREBL2
CCL24	CRELD1
CCL26	CRHR1
CCNB1	CRKL
CCND2	CRMP1
CCNL1	CRPPA
CCNO	CRTC3
CCR6	CRYBB2
CCT8L2	CRYBB3
CCZ1	CRYGN
CCZ1B	CRYGS
CD151	CTAGE15
CD163	CTAGE4
CD163L1	CTAGE6
CD180	CTAGE8
CD27	CTBP1
CD274	CTDP1
CD274	CTNND1
CD274	CTSD
CD274	CUL1
CD274	CWC27
CD274	CYCS
CD274	CYP2W1
CD274	CYP4V2
CD36	CYSRT1
CD4	CYTH3
CD69	CYTL1
CD81	DACT2
CD9	DAGLB
CDC20B	DBR1
CDC34	DCDC2C
CDC37L1	DCP1B
CDC37L1	DCT
CDC37L1	DCTD
CDC37L1	DDT
CDC37L1	DDTL
CDC37L1	DDX4
CDC37L1	DDX47
CDC37L1	DDX51
CDC45	DDX55
CDC45	DEAF1
CDC45	DEFB131A
CDC45	DENND11
CDC45	DENND2A
CDCA3	DENND4C
CDCA7L	DENR
CDHR5	DEPDC1B
CDK2AP1	DERA
CDK5	DERL3
CDK5	DET1
CDK5	DGCR2
CDK5	DGCR6
CDK7	DGCR6L
CDKN1B	DGCR8
CDKN2AIP	DGKB
CDYL	DGKG
CECR2	DGKQ
CECR2	DHX29
CECR2	DHX36
CECR2	DHX37
CECR2	DIABLO
CEND1	DIMT1
CENPH	DIPK1B
CENPK	DIPK2A
CENPU	DLG1
CEP19	DLGAP1
CEP192	DLL1
CEP192	DMAC1
CEP192	DMRT1
CEP43	DMRT2
CEP70	DMRT3
CEP76	DNAAF5
CEP76	DNAH10
CEP76	DNAH10OS
CER1	DNAH11
CER1	DNAJB11
CER1	DNAJB6
CER1	DNAJC3
CERS3	DNAJC30
CETN1	DNLZ
CETN1	DOCK8
CETN1	DOCK8-AS1
CETN1	DOCK9
CFAP251	DOK7
CFAP99	DPH3
CFD	DPH7
CHCHD10	DPP6
CHCHD10	DPP7
CHCHD10	DPPA3
CHCHD10	DRD4
CHCHD10	DRD5
CHCHD4	DRICH1
CHD2	DSP
CHD4	DTX2
chd7	DUSP16
chd7	DUSP22
CHFR	DUSP8
CHID1	DYNC2I1
CHL1	DYNLL1
CHMP1B	DYNLT1
CHMP1B	DYNLT2
CHMP1B	DYNLT2B
CHN2	DYRK4
CHPF2	DZIP1
CHPF2	DZIP1L
CHPF2	EAF1
CHPF2	ECI2
CHST12	EDEM1
CHST2	EDF1
CHSY1	EEF1E1
CIB1	EEF1E1-BLOC1S5
CIDEA	EFCAB4A
CIDEA	EFCAB4B
CIDEA	EFTUD2
CIDEC	EGFL7
CLCN1	EHMT1
CLDN1	EIF2A
CLDN10	EIF2AK1
CLDN16	EIF2B1
CLDN18	EIF3B
CLDN20	EIF4A2
CLDN22	EIF4H
CLDN24	ELANE
CLDN3	ELFN1
CLDN4	ELN
CLDN5	ELOVL7
CLDN5	EMC3
CLDN5	EMG1
CLDN5	EMILIN2
CLDN5	EMP1
CLEC12A	EN2
CLEC12B	ENO2
CLEC1A	ENOSF1
CLEC1B	ENPP6
CLEC2A	ENTPD2
CLEC2B	ENTPD8
CLEC2D	ENTR1
CLEC2L	EP300
CLEC4A	EP400
CLEC4C	EP400P1
CLEC4D	EPB41L3
CLEC4E	EPHA1
CLEC5A	EPHB6
CLEC6A	EPS8
CLEC7A	EPS8L2
CLEC9A	ERBIN
CLECL1	ERC1
CLIC3	ERCC5
CLIP1	ERCC8
CLIP2	ERICH6
CLNK	ERMARD
CLRN1	ERMP1
CLSTN2	ERP27
CLSTN3	ESM1
CLTCL1	ESR1
CLTCL1	ESS2
CLTCL1	ESYT2
CLTCL1	ESYT3
CLTCL1	ETV1
CLUL1	ETV5
CLUL1	ETV6
CLUL1	EVC
CLUL1	EVC2
CLYBL	EVX1
CNKSR3	EXD3
CNN2	EXOC2
CNPY1	EXT2
CNPY1	EZH2
CNPY1	EZR
CNPY1	F11
CNPY1	F13A1
CNTLN	FAIM
CNTLN	FAM110C
CNTLN	FAM120B
CNTN4	FAM126A
CNTN6	FAM131B
CNTNAP2	FAM149A
CNTNAP2	FAM150B
CNTNAP2	FAM154A
CNTNAP2	FAM166A
COL28A1	FAM169B
COL28A1	FAM174B
COL5A1	FAM193A
COLEC11	FAM20C
COLEC12	FAM210A
COLEC12	FAM217A
COLEC12	FAM220A
COLEC12	FAM221A
COLQ	FAM230G
COMMD2	FAM246A
COMT	FAM246B
COMT	FAM246C
COMT	FAM43A
COMT	FAM50B
COMT	FAM53A
COPB2	FAM90A1
COPS7A	FAM90A26
COQ5	FANCD2
COX19	FANCD2OS
COX6A1	FANCI
CP	FARP1
CPA3	FARS2
CPB1	FASTK
CPLX1	FAT1
CPN2	FBLN2
CPNE9	FBLN7
CPVL	FBRSL1
CPZ	FBXL14
CRBN	FBXL18
CREB5	FBXO45
CREBL2	FBXO5
CRELD1	FBXW5
CRHR1	FCN1
CRKL	FCN2
CRKL	FERD3L
CRKL	FES
CRKL	FETUB
CRKL	FGD5
CRMP1	FGF12
CRPPA	FGF14
CRTC3	FGF22
CRYBB2	FGF23
CRYBB2	FGF6
CRYBB2	FGFR3
CRYBB2	FGFRL1
CRYBB2	FGL2
CRYBB3	FKBP14
CRYBB3	FKBP4
CRYBB3	FKBP6
CRYBB3	FMC1
CRYBB3	FMC1-LUC7L2
CRYGN	FNDC1
CRYGN	FOXC1
CRYGN	FOXD4
CRYGN	FOXF2
CRYGS	FOXJ2
CTAGE15	FOXK1
CTAGE4	FOXL2
CTAGE6	FOXL2NB
CTAGE8	FOXL3
CTBP1	FOXM1
CTDP1	FOXQ1
CTDP1	FREM1
CTNND1	FRG1
CTNND1	FRG2
CTSD	FRMD1
CUL1	FSCN1
CUL1	FSTL3
CUL1	FURIN
CUL1	FUT7
CWC27	FYTTD1
CYCS	FZD10
CYP2W1	FZD9
CYP4V2	GAB4
CYSRT1	GABARAPL1
CYTH3	GAK
CYTL1	GALNT11
DACT2	GALNT15
DAGLB	GALNT8
DBR1	GALNT9
DCDC2C	GALNTL5
DCP1B	GALR1
DCT	GAPDH
DCTD	GAPT
DDT	GATC
DDT	GATSL1
DDT	GATSL2
DDT	GBX1
DDT	GDF3
DDTL	GDPGP1
DDTL	GET4
DDTL	GFM1
DDTL	GGACT
DDTL	GGT1
DDX4	GGT2
DDX47	GGT5
DDX51	GGTLC2
DDX55	GGTLC3
DEAF1	GHRL
DEFB131A	GIMAP1
DENND11	GIMAP1-GIMAP5
DENND2A	GIMAP2
DENND4C	GIMAP4
DENND4C	GIMAP5
DENND4C	GIMAP6
DENR	GIMAP7
DEPDC1B	GIMAP8
DERA	GINM1
DERL3	GK5
DERL3	GLCCI1
DERL3	GLDC
DERL3	GLI2
DERL3	GLIS3
DET1	GLT1D1
DGCR2	GLT6D1
DGCR2	GMDS
DGCR2	GMNC
DGCR2	GMPS
DGCR2	GNA12
DGCR6	GNA14
DGCR6	GNAI1
DGCR6	GNAL
DGCR6	GNAT3
DGCR6	GNAZ
DGCR6L	GNB1L
DGCR6L	GNB3
DGCR6L	GOLGA3
DGCR6L	GP1BB
DGCR6L	GP5
DGCR8	GPBP1
DGCR8	GPC5
DGCR8	GPC6
DGCR8	GPER1
DGCR8	GPNMB
DGKB	GPR146
DGKG	GPR149
DGKQ	GPR162
DHX29	GPR171
DHX36	GPR18
DHX37	GPR180
DIABLO	GPR183
DIMT1	GPR19
DIPK1B	GPR31
DIPK2A	GPR78
DLG1	GPR87
DLGAP1	GPRC5A
DLGAP1	GPRC5D
DLGAP1	GPSM1
DLGAP1	GPX4
DLL1	GPX8
DMAC1	GRID2IP
DMAC1	GRIFIN
DMAC1	GRIN1
DMAC1	GRIN2B
DMAC1	GRIN3B
DMRT1	GRIP2
DMRT1	GRK3
DMRT1	GRK4
DMRT1	GRK7
DMRT1	GRM7
DMRT1	GRPEL1
DMRT1	GSAP
DMRT1	GSC2
DMRT1	GSDME
DMRT2	GSG1
DMRT2	GSTK1
DMRT2	GSTT2
DMRT2	GSTT2B
DMRT2	GSTT4
DMRT2	GTF2H2
DMRT2	GTF2H2C
DMRT2	GTF2H3
DMRT2	GTF2H5
DMRT3	GTF2I
DMRT3	GTF2IRD1
DMRT3	GTF2IRD2
DMRT3	GTF2IRD2B
DMRT3	GUCD1
DMRT3	GUCY2C
DMRT3	GYG1
DMRT3	GZMA
DMRT3	GZMK
DNAAF5	GZMM
DNAH10	H2AFJ
DNAH10OS	H2BE1
DNAH11	HACL1
DNAJB11	HAPLN3
DNAJB6	HAUS3
DNAJB6	HAUS6
DNAJB6	HCAR1
DNAJB6	HCAR2
DNAJC3	HCAR3
DNAJC30	HCN2
DNLZ	HDAC11
DOCK8	HDAC9
DOCK8	HDDC3
DOCK8	HDHD5
DOCK8	HEBP1
DOCK8	HELT
DOCK8	HES1
DOCK8	HGF
DOCK8	HGFAC
DOCK8	HIBADH
DOCK8-AS1	HIC2
DOCK8-AS1	HIP1
DOCK8-AS1	HIP1R
DOCK8-AS1	HIPK2
DOCK8-AS1	HIRA
DOCK8-AS1	HIST4H4
DOCK9	HLTF
DOK7	HMX1
DPH3	HNF1A
DPH7	HNRNPA2B1
DPP6	HOXA1
DPP6	HOXA10
DPP6	HOXA11
DPP6	HOXA13
DPP6	HOXA2
DPP7	HOXA3
DPPA3	HOXA4
DRD4	HOXA5
DRD5	HOXA6
DRICH1	HOXA7
DRICH1	HOXA9
DRICH1	HPD
DRICH1	HPS3
DRICH1	HRAS
DSP	HRG
DTX2	HRH1
DUSP16	HS6ST3
DUSP22	HSBP1L1
DUSP8	HSPB1
DYNC2I1	HTR1A
DYNC2I1	HTR5A
DYNC2I1	HTR5A-AS1
DYNC2I1	HTRA3
DYNLL1	HTT
DYNLT1	HUS1B
DYNLT2	ICA1
DYNLT2B	IDH2
DYRK4	IDUA
DZIP1	IFFO1
DZIP1L	IFITM1
EAF1	IFITM10
ECI2	IFITM2
EDEM1	IFITM3
EDF1	IFITM5
EEF1E1	IGF1R
EEF1E1-BLOC1S5	IGF2
EFCAB4A	IGF2BP2
EFCAB4B	IGF2BP2-AS1
EFTUD2	IGF2BP3
EFTUD2	IGF2R
EFTUD2	IGLC1
EFTUD2	IGLC2
EFTUD2	IGLC3
EFTUD2	IGLC7
EFTUD2	IGLJ1
EGFL7	IGLJ2
EHMT1	IGLJ3
EIF2A	IGLJ4
EIF2AK1	IGLJ5
EIF2B1	IGLJ6
EIF3B	IGLJ7
EIF4A2	IGLL1
EIF4H	IGLL5
ELANE	IGLV1-36
ELFN1	IGLV1-40
ELN	IGLV1-44
ELOVL7	IGLV1-47
EMC3	IGLV1-50
EMG1	IGLV1-51
EMILIN2	IGLV10-54
EMILIN2	IGLV11-55
EMILIN2	IGLV2-11
EMILIN2	IGLV2-14
EMP1	IGLV2-18
EN2	IGLV2-23
EN2	IGLV2-33
EN2	IGLV2-8
EN2	IGLV3-1
EN2	IGLV3-10
ENO2	IGLV3-12
ENOSF1	IGLV3-16
ENOSF1	IGLV3-19
ENOSF1	IGLV3-21
ENOSF1	IGLV3-22
ENPP6	IGLV3-25
ENTPD2	IGLV3-27
ENTPD8	IGLV3-32
ENTR1	IGLV3-9
EP300	IGLV4-3
EP300	IGLV4-60
EP400	IGLV4-69
EP400P1	IGLV5-37
EPB41L3	IGLV5-45
EPB41L3	IGLV5-48
EPB41L3	IGLV5-52
EPB41L3	IGLV6-57
EPHA1	IGLV7-43
EPHB6	IGLV7-46
EPS8	IGLV8-61
EPS8L2	IGLV9-49
ERBIN	IGSF10
ERC1	IL12A
ERCC5	IL17RA
ERCC8	IL17RC
ERICH6	IL17RE
ERMARD	IL1RAP
ERMP1	IL31
ERMP1	IL31RA
ERMP1	IL33
ERMP1	IL5RA
ERMP1	IL6
ERMP1	IL6ST
ERMP1	IMPA2
ERMP1	ING2
ERP27	ING4
ESM1	INPP5E
ESR1	INS
ESS2	INSIG1
ESS2	INSL4
ESS2	INSL6
ESS2	INTS1
ESS2	IPCEF1
ESYT2	IPO11
ESYT2	IPO5
ESYT2	IQCA1L
ESYT2	IQCE
ESYT3	IQCG
ETV1	IQCJ
ETV5	IQCJ-SCHIP1
ETV6	IQGAP1
EVC	IQSEC1
EVC2	IQSEC3
EVX1	IRAK2
EXD3	IRF2
EXOC2	IRF4
EXT2	IRF7
EZH2	ISG20
EZH2	ITFG2
EZH2	ITGB8
EZH2	ITGBL1
EZR	ITPR1
F11	IYD
F13A1	JAGN1
FAIM	JAK2
FAM110C	JAKMIP1
FAM120B	JAZF1
FAM126A	KANK1
FAM131B	KANSL1
FAM149A	KATNA1
FAM150B	KCNA1
FAM154A	KCNA5
FAM166A	KCNA6
FAM169B	KCNAB1
FAM174B	KCNG2
FAM193A	KCNH2
FAM20C	KCNQ1
FAM210A	KCNT1
FAM210A	KCNV2
FAM210A	KDELR2
FAM217A	KDM2B
FAM220A	KDM4C
FAM221A	KDM5A
FAM230G	KDM7A
FAM230G	KEL
FAM230G	KIAA0020
FAM230G	KIAA0087
FAM230G	KIAA0232
FAM246A	KIAA1430
FAM246A	KIAA1432
FAM246A	KIAA1467
FAM246A	KIAA1549
FAM246A	KIAA1671
FAM246A	KIAA2026
FAM246B	KIF25
FAM246B	KIF2A
FAM246B	KIF7
FAM246B	KISS1R
FAM246B	KLHL22
FAM246C	KLHL7
FAM246C	KLKB1
FAM246C	KLRB1
FAM246C	KLRC1
FAM246C	KLRC2
FAM43A	KLRC3
FAM50B	KLRC4
FAM53A	KLRD1
FAM90A1	KLRF1
FAM90A26	KLRF2
FANCD2	KLRG1
FANCD2OS	KLRG2
FANCI	KLRK1
FARP1	KMT2A
FARS2	KMT2C
FASTK	KMT5A
FASTK	KNG1
FASTK	KNTC1
FASTK	KPNA4
FAT1	KRBA1
FBLN2	KRTAP5-1
FBLN7	KRTAP5-2
FBRSL1	KRTAP5-3
FBXL14	KRTAP5-4
FBXL18	KRTAP5-5
FBXO45	KRTAP5-6
FBXO5	L3MBTL4
FBXW5	LAG3
FCN1	LAMA1
FCN2	LARP7
FERD3L	LAT2
FES	LATS1
FETUB	LCN1
FGD5	LCN10
FGF12	LCN12
FGF14	LCN15
FGF22	LCN6
FGF23	LCN8
FGF6	LCN9
FGFR3	LCNL1
FGFRL1	LDLRAD4
FGL2	LEKR1
FKBP14	LEPREL2
FKBP4	LETM1
FKBP6	LFNG
FMC1	LHFPL4
FMC1-LUC7L2	LHX3
FNDC1	LIMK1
FOXC1	LINC00955
FOXD4	LINC01100
FOXD4	LINC01387
FOXD4	LINC01558
FOXD4	LINC01587
FOXD4	LINC01600
FOXD4	LINC02210-CRHR1
FOXD4	LINC02692
FOXD4	LINC02860
FOXF2	LINC02877
FOXJ2	LINS
FOXK1	LLCFC1
FOXL2	LMBR1
FOXL2NB	LMCD1
FOXL3	LMLN
FOXM1	LMO3
FOXQ1	LOH12CR1
FREM1	LPA
FREM1	LPAR5
FREM1	LPCAT3
FREM1	LPIN2
FRG1	LPP
FRG2	LRCH3
FRMD1	LRCOL1
FSCN1	LRP11
FSTL3	LRP2BP
FURIN	LRP5L
FUT7	LRP6
FYTTD1	LRPAP1
FZD10	LRRC15
FZD9	LRRC23
GAB4	LRRC26
GABARAPL1	LRRC28
GAK	LRRC30
GALNT11	LRRC43
GALNT11	LRRC56
GALNT11	LRRC61
GALNT11	LRRC70
GALNT15	LRRC72
GALNT8	LRRC74B
GALNT9	LRRC75B
GALNTL5	LRRK1
GALNTL5	LRRN1
GALNTL5	LRTM2
GALNTL5	LSG1
GALR1	LSM3
GALR1	LSP1
GAPDH	LTBR
GAPT	LUC7L2
GATC	LURAP1L
GATSL1	LXN
GATSL2	LY86
GBX1	LYAR
GBX1	LYRM4
GBX1	LYSMD4
GBX1	LZTR1
GDF3	M6PR
GDPGP1	MACC1
GET4	MAD1L1
GFM1	MADCAM1
GGACT	MAEA
GGT1	MAFK
GGT1	MAGI2
GGT1	MAGOHB
GGT1	MALL
GGT1	MALSU1
GGT2	MAMDC4
GGT2	MAN1B1
GGT2	MAN2A2
GGT2	MAN2B2
GGT2	MANSC1
GGT2	MAP3K1
GGT5	MAP3K4
GGT5	MAPK1
GGT5	MAPT
GGT5	MARVELD2
GGT5	MAS1
GGTLC2	MASP1
GGTLC2	MAST4
GGTLC2	MB21D2
GGTLC2	MBNL1
GGTLC2	MBNL2
GGTLC2	MBP
GGTLC3	MC2R
GGTLC3	MC5R
GGTLC3	MCIDAS
GGTLC3	MCTP2
GGTLC3	MDH2
GHRL	MED12L
GIMAP1	MED15
GIMAP1	MED16
GIMAP1	MEF2A
GIMAP1	MELAN-A
GIMAP1-GIMAP5	MELTF
GIMAP1-GIMAP5	MEOX2
GIMAP1-GIMAP5	MERTK
GIMAP1-GIMAP5	MESP1
GIMAP2	MESP2
GIMAP2	METTL21C
GIMAP2	METTL4
GIMAP2	METTL6
GIMAP4	MFAP5
GIMAP4	MFGE8
GIMAP4	MFSD1
GIMAP4	MFSD10
GIMAP5	MGAM
GIMAP5	MGAM2
GIMAP5	MGP
GIMAP5	MGST1
GIMAP6	MICAL3
GIMAP6	MICALL2
GIMAP6	MIER2
GIMAP6	MIER3
GIMAP7	MIF
GIMAP7	MINDY4B
GIMAP7	MIOS
GIMAP7	MISP
GIMAP8	MKRN1
GIMAP8	MKRN2
GIMAP8	MLANA
GIMAP8	MLEC
GINM1	MLF1
GK5	MLF2
GLCCI1	MLXIP
GLCCI1	MLXIPL
GLDC	MMD2
GLDC	MME
GLDC	MMP11
GLDC	MMP17
GLDC	MNX1
GLDC	MOB2
GLDC	MORN3
GLDC	MPC1
GLI2	MPDZ
GLIS3	MPHOSPH9
GLIS3	MPP6
GLIS3	MPPE1
GLIS3	MRAS
GLIS3	MRFAP1
GLIS3	MRFAP1L1
GLIS3	MRM2
GLIS3	MRPL18
GLT1D1	MRPL23
GLT6D1	MRPL40
GMDS	MRPL41
GMNC	MRPL46
GMPS	MRPL51
GNA12	MRPS11
GNA14	MRPS2
GNAI1	MRPS22
GNAL	MRPS25
GNAL	MRPS33
GNAL	MRPS36
GNAT3	MSANTD1
GNAZ	MSI1
GNAZ	MSX1
GNAZ	MTCL1
GNAZ	MTHFD1L
GNAZ	MTLN
GNAZ	MTMR14
GNB1L	MTNR1A
GNB1L	MTREX
GNB1L	MTRF1L
GNB1L	MTRNR2L6
GNB1L	MTURN
GNB3	MUC2
GOLGA3	MUC20
GP1BB	MUC4
GP1BB	MUC5AC
GP1BB	MUC5B
GP1BB	MUC6
GP1BB	MXD4
GP5	MYCT1
GPBP1	MYL12A
GPC5	MYL12B
GPC5	MYL5
GPC6	MYLK4
GPER1	MYOM1
GPNMB	MYT1L
GPR146	NACC2
GPR149	NAIP
GPR162	NALCN
GPR171	NANOG
GPR18	NANOGNB
GPR180	NAPG
GPR183	NAT8L
GPR19	NCAPD2
GPR31	NCAPG2
GPR78	NCBP2
GPR87	NCBP2AS2
GPRC5A	NCF1
GPRC5D	NCOR2
GPSM1	NDC80
GPX4	NDOR1
GPX8	NDUFA4
GRID2IP	NDUFA9
GRIFIN	NDUFAF2
GRIN1	NDUFB2
GRIN2B	NDUFV2
GRIN3B	NECAP1
GRIP2	NELFA
GRK3	NELFB
GRK3	NFATC1
GRK3	NFE2L3
GRK3	NFIB
GRK3	NGRN
GRK4	NINJ2
GRK7	NIPBL
GRM7	NKX1-1
GRPEL1	NLN
GSAP	NLRP6
GSC2	NMD3
GSC2	NME9
GSC2	NMNAT3
GSC2	NOBOX
GSC2	NOC4L
GSDME	NOM1
GSG1	NOP14
GSTK1	NOP2
GSTT2	NOS3
GSTT2	NOTCH1
GSTT2	NOX3
GSTT2	NOXA1
GSTT2	NPDC1
GSTT2B	NPHP1
GSTT2B	NPHP4
GSTT2B	NPVF
GSTT2B	NPY
GSTT2B	NQO2
GSTT4	NR2C2
GSTT4	NR2F2
GSTT4	NRARP
GSTT4	NRIP2
GSTT4	NRN1
GTF2H2	NRROS
GTF2H2C	NSD2
GTF2H3	NSG1
GTF2H5	NSMF
GTF2I	NSUN5
GTF2IRD1	NTF3
GTF2IRD2	NUB1
GTF2IRD2B	NUDT1
GUCD1	NUP210
GUCD1	NUP42
GUCD1	NUP43
GUCD1	NXPH1
GUCD1	OASL
GUCY2C	OBP2A
GYG1	OCLN
GZMA	OCM
GZMK	ODF3
GZMM	ODF3L2
H2AFJ	OFCC1
H2BE1	OGFOD2
H2BE1	OGG1
H2BE1	OLFM1
H2BE1	OLR1
HACL1	OPA1
HAPLN3	OPRM1
HAUS3	OR10AC1
HAUS6	OR2A1
HAUS6	OR2A12
HAUS6	OR2A14
HCAR1	OR2A2
HCAR2	OR2A25
HCAR3	OR2A42
HCN2	OR2A5
HDAC11	OR2A7
HDAC9	OR2F1
HDDC3	OR2F2
HDHD5	OR4F15
HEBP1	OR4F6
HELT	OR6B1
HES1	OR6V1
HGF	OR9A1P
HGFAC	OR9A2
HIBADH	OR9A4
HIC2	ORAI1
HIC2	OSBPL3
HIC2	OSTN
HIC2	OTOL1
HIC2	OTOP1
HIC2	OXGR1
HIP1	OXNAD1
HIP1R	OXTR
HIPK2	P2RX2
HIRA	P2RX4
HIRA	P2RX6
HIRA	P2RX7
HIRA	P2RY1
HIRA	P2RY12
HIST4H4	P2RY13
HLTF	P2RY14
HMX1	P3H2
HNF1A	PACRG
HNRNPA2B1	PAEP
HOXA1	PAK2
HOXA10	PALM
HOXA11	PAPOLB
HOXA13	PAQR9
HOXA2	PARD6G
HOXA3	PARP11
HOXA4	PARP12
HOXA5	PAX6
HOXA6	PAXIP1
HOXA7	PAXIP1-AS2
HOXA9	PAXX
HPD	PCCA
HPS3	PCGF3
HRAS	PCLO
HRG	PCMT1
HRH1	PCOLCE2
HS6ST3	PCSK6
HSBP1L1	PCYT1A
HSBP1L1	PDCD10
HSBP1L1	PDCD1LG2
HSPB1	PDCD2
HTR1A	PDDC1
HTR5A	PDE10A
HTR5A	PDE3A
HTR5A	PDE4D
HTR5A	PDE6B
HTR5A	PDE6H
HTR5A-AS1	PDGFA
HTR5A-AS1	PDIA4
HTR5A-AS1	PDLIM3
HTR5A-AS1	PEX11A
HTR5A-AS1	PEX26
HTRA3	PEX5
HTT	PFN2
HUS1B	PGAM5
ICA1	PGPEP1L
ICA1	PHB2
IDH2	PHC1
IDUA	PHF10
IFFO1	PHF14
IFITM1	PHPT1
IFITM10	PHRF1
IFITM2	PHTF2
IFITM3	PI4KA
IFITM5	PIANP
IGF1R	PIDD
IGF2	PIEZO2
IGF2BP2	PIGG
IGF2BP2-AS1	PIGX
IGF2BP3	PIGZ
IGF2R	PIK3C2G
IGLC1	PIK3CB
IGLC1	PIK3R1
IGLC1	PIP
IGLC1	PITPNM2
IGLC1	PIWIL1
IGLC1	PIWIL3
IGLC2	PKP3
IGLC2	PLA2G1B
IGLC2	PLAAT1
IGLC2	PLBD1
IGLC2	PLCH1
IGLC2	PLCZ1
IGLC3	PLEKHA5
IGLC3	PLEKHA8
IGLC3	PLEKHG1
IGLC3	PLEKHG6
IGLC3	PLG
IGLC3	PLGRKT
IGLC7	PLIN1
IGLC7	PLIN2
IGLC7	PLK2
IGLC7	PLOD2
IGLC7	PLPP1
IGLC7	PLPP2
IGLJ1	PLPP6
IGLJ1	PLPPR3
IGLJ1	PLS1
IGLJ1	PLSCR1
IGLJ1	PLSCR2
IGLJ1	PLSCR4
IGLJ2	PLSCR5
IGLJ2	PMPCA
IGLJ2	PMS2
IGLJ2	PNLDC1
IGLJ2	PNPLA2
IGLJ2	PNPLA7
IGLJ3	POGLUT2
IGLJ3	POLE
IGLJ3	POLG
IGLJ3	POLN
IGLJ3	POLR1A
IGLJ3	POLR1F
IGLJ4	POLR2E
IGLJ4	POLR2L
IGLJ4	POLRMT
IGLJ4	POM121
IGLJ4	POM121C
IGLJ4	POM121L7P
IGLJ5	POMZP3
IGLJ5	POP5
IGLJ5	POR
IGLJ5	POTEC
IGLJ5	PPAPDC2
IGLJ5	PPARG
IGLJ6	PPIL2
IGLJ6	PPIL4
IGLJ6	PPM1F
IGLJ6	PPM1L
IGLJ6	PPP1R14C
IGLJ6	PPP1R2
IGLJ7	PPP1R26
IGLJ7	PPP1R3G
IGLJ7	PPP2R2C
IGLJ7	PPP4R1
IGLJ7	PPWD1
IGLJ7	PRAME
IGLL1	PRB1
IGLL1	PRB2
IGLL1	PRB3
IGLL1	PRB4
IGLL1	PRC1
IGLL5	PRELID3A
IGLL5	PRH1
IGLL5	PRH2
IGLL5	PRIMPOL
IGLL5	PRKAG2
IGLL5	PRKAR1B
IGLV10-54	PRKN
IGLV10-54	PRMT8
IGLV10-54	PRODH
IGLV10-54	PRPF4B
IGLV10-54	PRPS1L1
IGLV10-54	PRR15
IGLV10-54	PRR18
IGLV11-55	PRR23A
IGLV11-55	PRR23B
IGLV11-55	PRR23C
IGLV11-55	PRR4
IGLV11-55	PRRT3
IGLV11-55	PRSS1
IGLV11-55	PRSS2
IGLV1-36	PRSS37
IGLV1-36	PRSS57
IGLV1-36	PRSS58
IGLV1-36	PRTN3
IGLV1-36	PSAPL1
IGLV1-36	PSIP1
IGLV1-36	PSMB1
IGLV1-40	PSMD13
IGLV1-40	PSMD9
IGLV1-40	PSMG2
IGLV1-40	PSMG3
IGLV1-40	PSMG4
IGLV1-40	PTBP1
IGLV1-40	PTDSS2
IGLV1-44	PTEN
IGLV1-44	PTGDS
IGLV1-44	PTMS
IGLV1-44	PTPN12
IGLV1-44	PTPN2
IGLV1-44	PTPN6
IGLV1-44	PTPRD
IGLV1-47	PTPRM
IGLV1-47	PTPRN2
IGLV1-47	PTPRO
IGLV1-47	PTX3
IGLV1-47	PUM3
IGLV1-47	PUS1
IGLV1-47	PXDC1
IGLV1-50	PXDN
IGLV1-50	PXMP2
IGLV1-50	PXN
IGLV1-50	PXYLP1
IGLV1-50	PYDC2
IGLV1-50	PZP
IGLV1-50	QKI
IGLV1-51	QSOX2
IGLV1-51	R3HDM4
IGLV1-51	RAB12
IGLV1-51	RAB19
IGLV1-51	RAB31
IGLV1-51	RAB36
IGLV1-51	RAB3C
IGLV2-11	RABL6
IGLV2-11	RAC1
IGLV2-11	RAD17
IGLV2-11	RAD18
IGLV2-11	RAD51AP1
IGLV2-11	RAD52
IGLV2-14	RADIL
IGLV2-14	RAET1E
IGLV2-14	RAET1G
IGLV2-14	RAET1L
IGLV2-14	RAF1
IGLV2-14	RALBP1
IGLV2-18	RAMACL
IGLV2-18	RAN
IGLV2-18	RANBP1
IGLV2-18	RANBP6
IGLV2-18	RAP2A
IGLV2-18	RAP2B
IGLV2-23	RAPGEF5
IGLV2-23	RARRES1
IGLV2-23	RARRES2
IGLV2-23	RASA2
IGLV2-23	RASSF7
IGLV2-23	RBAK
IGLV2-33	RBAK-RBAKDN
IGLV2-33	RBFA
IGLV2-33	RBM33
IGLV2-33	RBP1
IGLV2-33	RBP2
IGLV2-33	RBP5
IGLV2-33	RCCD1
IGLV2-8	RCL1
IGLV2-8	REPIN1
IGLV2-8	RERG
IGLV2-8	RERGL
IGLV2-8	RFC2
IGLV2-8	RFC4
IGLV3-1	RFLNA
IGLV3-1	RFTN1
IGLV3-1	RFX3
IGLV3-1	RGL4
IGLV3-1	RGMA
IGLV3-1	RGS12
IGLV3-10	RGS17
IGLV3-10	RGS7BP
IGLV3-10	RHBDD2
IGLV3-10	RHCG
IGLV3-10	RHEB
IGLV3-10	RHNO1
IGLV3-12	RHOF
IGLV3-12	RIC1
IGLV3-12	RIC8A
IGLV3-12	RILPL1
IGLV3-12	RILPL2
IGLV3-12	RIMBP2
IGLV3-16	RIMBP3
IGLV3-16	RIMBP3B
IGLV3-16	RIMBP3C
IGLV3-16	RIMKLB
IGLV3-16	RIOK1
IGLV3-16	RIPK1
IGLV3-19	RLBP1
IGLV3-19	RLN1
IGLV3-19	RLN2
IGLV3-19	RMND1
IGLV3-19	RNASEH1
IGLV3-19	RNASET2
IGLV3-21	RNF10
IGLV3-21	RNF113B
IGLV3-21	RNF126
IGLV3-21	RNF13
IGLV3-21	RNF168
IGLV3-21	RNF180
IGLV3-22	RNF208
IGLV3-22	RNF212
IGLV3-22	RNF216
IGLV3-22	RNF224
IGLV3-22	RNF32
IGLV3-22	RNF34
IGLV3-25	RNF4
IGLV3-25	RNF7
IGLV3-25	RNH1
IGLV3-25	RNMT
IGLV3-25	RPA3
IGLV3-25	RPL32
IGLV3-27	RPL35A
IGLV3-27	RPL39L
IGLV3-27	RPLP0
IGLV3-27	RPLP2
IGLV3-27	RPP40
IGLV3-27	RPS6
IGLV3-32	RPS6KA2
IGLV3-32	RPS7
IGLV3-32	RPUSD3
IGLV3-32	RRAGA
IGLV3-32	RREB1
IGLV3-32	RSBN1L
IGLV3-32	RSPH10B
IGLV3-9	RSPH10B2
IGLV3-9	RSPH14
IGLV3-9	RSPH3
IGLV3-9	RSRC1
IGLV3-9	RSRC2
IGLV3-9	RTL10
IGLV4-3	RTN4R
IGLV4-3	RTP1
IGLV4-3	RTP2
IGLV4-3	RTP4
IGLV4-3	RUBCN
IGLV4-3	RWDD4
IGLV4-60	S100P
IGLV4-60	SALL3
IGLV4-60	SAPCD2
IGLV4-60	SASH1
IGLV4-60	SAXO1
IGLV4-60	SBNO1
IGLV4-60	SBNO2
IGLV4-69	SCAF8
IGLV4-69	SCARB1
IGLV4-69	SCARF2
IGLV4-69	SCGB1C1
IGLV4-69	SCHIP1
IGLV4-69	SCIN
IGLV4-69	SCNN1A
IGLV5-37	SCRN1
IGLV5-37	SCT
IGLV5-37	SDF2L1
IGLV5-37	SDK1
IGLV5-37	SEC13
IGLV5-37	SEC16A
IGLV5-37	SEH1L
IGLV5-45	SELENOT
IGLV5-45	SEMA3A
IGLV5-45	SEMA3C
IGLV5-45	SEMA3D
IGLV5-45	SEMA3E
IGLV5-45	SEMA4B
IGLV5-45	SENP5
IGLV5-48	SEPTIN5
IGLV5-48	SERAC1
IGLV5-48	SERF1A
IGLV5-48	SERF1B
IGLV5-48	SERP1
IGLV5-48	SERPINB1
IGLV5-48	SERPINB6
IGLV5-52	SERPINB9
IGLV5-52	SERPIND1
IGLV5-52	SERPINI1
IGLV5-52	SERPINI2
IGLV5-52	SETD1B
IGLV5-52	SETD5
IGLV5-52	SETD9
IGLV6-57	SETMAR
IGLV6-57	SFSWAP
IGLV6-57	SFT2D1
IGLV6-57	SGSM1
IGLV6-57	SGTB
IGLV6-57	SH3BP2
IGLV6-57	SH3BP5
IGLV7-43	SH3GL2
IGLV7-43	SH3TC1
IGLV7-43	SH3YL1
IGLV7-43	SHC2
IGLV7-43	SHH
IGLV7-43	SHISAL2B
IGLV7-43	SHLD3
IGLV7-46	SHOX2
IGLV7-46	SI
IGLV7-46	SIAH2
IGLV7-46	SIGIRR
IGLV7-46	SIRT3
IGLV7-46	SIRT4
IGLV7-46	SKAP2
IGLV8-61	SLBP
IGLV8-61	SLC10A2
IGLV8-61	SLC15A1
IGLV8-61	SLC15A4
IGLV8-61	SLC15A5
IGLV8-61	SLC1A1
IGLV8-61	SLC22A1
IGLV9-49	SLC22A2
IGLV9-49	SLC22A23
IGLV9-49	SLC22A3
IGLV9-49	SLC24A2
IGLV9-49	SLC25A1
IGLV9-49	SLC25A18
IGLV9-49	SLC25A22
IGSF10	SLC25A36
IL12A	SLC25A4
IL17RA	SLC26A1
IL17RC	SLC29A4
IL17RE	SLC2A11
IL1RAP	SLC2A14
IL31	SLC2A3
IL31RA	SLC2A9
IL33	SLC30A5
IL33	SLC33A1
IL33	SLC34A3
IL33	SLC35B3
IL33	SLC35G4
IL33	SLC37A3
IL33	SLC38A9
IL33	SLC49A3
IL5RA	SLC4A2
IL6	SLC51A
IL6ST	SLC66A1L
IMPA2	SLC66A2
IMPA2	SLC6A1
IMPA2	SLC6A11
ING2	SLC6A12
ING4	SLC6A13
INPP5E	SLC6A6
INS	SLC7A4
INSIG1	SLC9A9
INSIG1	SLCO1B1
INSIG1	SLCO1B3
INSIG1	SLCO1B7
INSIG1	SLCO1C1
INSL4	SLCO3A1
INSL4	SLITRK3
INSL4	SMARCA2
INSL4	SMARCB1
INSL4	SMARCD3
INSL4	SMC4
INSL4	SMCHD1
INSL4	SMCO1
INSL6	SMCO3
INSL6	SMIM15
INSL6	SMN1
INSL6	SMN2
INSL6	SMOC2
INSL6	SNAP29
INSL6	SNAPC3
INSL6	SNAPC4
INTS1	SNRNP35
IPCEF1	SNRNP48
IPO11	SNRPA1
IPO5	SNRPD3
IQCA1L	SNTG2
IQCA1L	SNX10
IQCA1L	SNX13
IQCA1L	SNX25
IQCE	SNX8
IQCG	SNX9
IQCJ	SOD2
IQCJ-SCHIP1	SOHLH1
IQGAP1	SORBS2
IQSEC1	SORCS2
IQSEC3	SOSTDC1
IRAK2	SOX21
IRF2	SP4
IRF4	SP8
IRF7	SPATA6L
ISG20	SPECC1L
ITFG2	SPECC1L-ADORA2A
ITGB8	SPIRE1
ITGB8	SPON2
ITGBL1	SPPL2C
ITPR1	SPPL3
IYD	SPSB2
JAGN1	SPSB4
JAK2	SPTSSB
JAK2	SRCRB4D
JAK2	SREK1
JAK2	SREK1IP1
JAK2	SRGAP3
JAK2	SRRM3
JAK2	SRSF9
JAK2	SSBP1
JAKMIP1	SSNA1
JAZF1	SSR1
KANK1	SSR3
KANK1	SST
KANK1	SSUH2
KANK1	ST6GAL1
KANK1	ST8SIA2
KANK1	STAG2
KANK1	STEAP1B
KANK1	STH
KANK1	STK24
KANSL1	STK31
KATNA1	STK32B
KCNA1	STOX2
KCNA5	STPG3
KCNA6	STRAP
KCNAB1	STRIT1
KCNG2	STX18
KCNG2	STX1A
KCNH2	STX2
KCNH2	STYK1
KCNH2	STYXL1
KCNH2	SUCNR1
KCNQ1	SUMF1
KCNT1	SUMO4
KCNV2	SUN1
KCNV2	SUSD2
KCNV2	SV2B
KCNV2	SVOPL
KCNV2	SYN2
KCNV2	SYNE1
KCNV2	SYNJ2
KCNV2	SYNM
KDELR2	SYT8
KDM2B	SYTL3
KDM4C	TAB2
KDM4C	TACC3
KDM4C	TADA2B
KDM4C	TADA3
KDM4C	TAF9
KDM4C	TAGAP
KDM4C	TALDO1
KDM4C	TAMM41
KDM5A	TANGO2
KDM7A	TAPBPL
KEL	TARSL2
KIAA0020	TAS2R10
KIAA0020	TAS2R13
KIAA0020	TAS2R14
KIAA0087	TAS2R19
KIAA0232	TAS2R20
KIAA1430	TAS2R3
KIAA1432	TAS2R30
KIAA1432	TAS2R31
KIAA1432	TAS2R38
KIAA1467	TAS2R39
KIAA1549	TAS2R4
KIAA1671	TAS2R40
KIAA1671	TAS2R41
KIAA1671	TAS2R42
KIAA1671	TAS2R43
KIAA1671	TAS2R46
KIAA2026	TAS2R5
KIAA2026	TAS2R50
KIAA2026	TAS2R60
KIAA2026	TAS2R7
KIAA2026	TAS2R8
KIAA2026	TAS2R9
KIAA2026	TATDN2
KIAA2026	TAX1BP1
KIF25	TBC1D14
KIF2A	TBCCD1
KIF7	TBL2
KISS1R	TBP
KLHL22	TBX1
KLHL22	TBXAS1
KLHL22	TBXT
KLHL22	TCAF1
KLHL22	TCAF2
KLHL7	TCAF2C
KLKB1	TCP1
KLRB1	TCP10L2
KLRC1	TCP10L3
KLRC2	TCTN2
KLRC3	TEAD4
KLRC4	TENM3
KLRD1	TEX30
KLRF1	TFAP2A
KLRF2	TFB1M
KLRG1	TFDP2
KLRG2	TFRC
KLRK1	TGDS
KMT2A	TGIF1
KMT2C	TH
KMT2C	THAP7
KMT2C	THBS2
KMT2C	THEG
KMT5A	THOC1
KNG1	THSD7A
KNTC1	THUMPD3
KPNA4	TIAM2
KRBA1	TICRR
KRBA1	TIMP4
KRBA1	TIPARP
KRBA1	TLR3
KRTAP5-1	TM2D3
KRTAP5-2	TM4SF1
KRTAP5-3	TM4SF18
KRTAP5-4	TM4SF19
KRTAP5-5	TM4SF19-DYNLT2B
KRTAP5-6	TM4SF4
L3MBTL4	TM9SF2
L3MBTL4	TMED2
L3MBTL4	TMEM106B
L3MBTL4	TMEM120A
LAG3	TMEM120B
LAMA1	TMEM121B
LAMA1	TMEM128
LAMA1	TMEM129
LAMA1	TMEM132B
LARP7	TMEM132C
LAT2	TMEM132D
LATS1	TMEM139
LCN1	TMEM141
LCN10	TMEM14EP
LCN12	TMEM175
LCN15	TMEM176A
LCN6	TMEM176B
LCN8	TMEM178B
LCN9	TMEM18
LCNL1	TMEM181
LDLRAD4	TMEM184A
LDLRAD4	TMEM191B
LDLRAD4	TMEM191C
LEKR1	TMEM196
LEPREL2	TMEM200C
LETM1	TMEM203
LFNG	TMEM207
LHFPL4	TMEM210
LHX3	TMEM211
LIMK1	TMEM213
LINC00955	TMEM242
LINC01100	TMEM250
LINC01387	TMEM259
LINC01387	TMEM261
LINC01387	TMEM271
LINC01387	TMEM40
LINC01558	TMEM43
LINC01587	TMEM44
LINC01600	TMEM52B
LINC02210-CRHR1	TMEM60
LINC02692	TMEM80
LINC02860	TMEM87B
LINC02877	TMTC4
LINS	TMUB1
LLCFC1	TNFRSF1A
LMBR1	TNIP2
LMBR1	TNK2
LMBR1	TNNI2
LMBR1	TNNT3
LMCD1	TNRC18
LMLN	TOLLIP
LMO3	TOMM7
LOH12CR1	TOP3B
LPA	TOR4A
LPAR5	TP63
LPCAT3	TPD52L3
LPIN2	TPGS1
LPIN2	TPI1
LPIN2	TPK1
LPIN2	TPO
LPP	TPP2
LRCH3	TPRG1
LRCOL1	TPRN
LRP11	TRA2A
LRP2BP	TRA2B
LRP5L	TRAF2
LRP5L	TRAPPC11
LRP5L	TRAPPC12
LRP5L	TRAPPC13
LRP5L	TRBC1
LRP6	TRBC2
LRPAP1	TRBD1
LRRC15	TRBJ1-1
LRRC23	TRBJ1-2
LRRC26	TRBJ1-3
LRRC28	TRBJ1-4
LRRC30	TRBJ1-5
LRRC30	TRBJ1-6
LRRC30	TRBJ2-1
LRRC43	TRBJ2-2
LRRC56	TRBJ2-2P
LRRC61	TRBJ2-3
LRRC61	TRBJ2-4
LRRC61	TRBJ2-5
LRRC61	TRBJ2-6
LRRC70	TRBJ2-7
LRRC72	TRBV10-1
LRRC74B	TRBV10-2
LRRC74B	TRBV10-3
LRRC74B	TRBV11-1
LRRC74B	TRBV11-3
LRRC74B	TRBV12-3
LRRC75B	TRBV12-4
LRRC75B	TRBV12-5
LRRC75B	TRBV13
LRRC75B	TRBV14
LRRC75B	TRBV15
LRRK1	TRBV16
LRRN1	TRBV17
LRTM2	TRBV18
LSG1	TRBV19
LSM3	TRBV2
LSP1	TRBV20-1
LTBR	TRBV23-1
LUC7L2	TRBV24-1
LURAP1L	TRBV25-1
LURAP1L	TRBV27
LURAP1L	TRBV28
LURAP1L	TRBV29-1
LURAP1L	TRBV3-1
LXN	TRBV30
LY86	TRBV4-1
LYAR	TRBV4-2
LYRM4	TRBV5-1
LYSMD4	TRBV5-3
LZTR1	TRBV5-4
LZTR1	TRBV5-5
LZTR1	TRBV5-6
LZTR1	TRBV5-7
LZTR1	TRBV6-1
M6PR	TRBV6-2
MACC1	TRBV6-4
MAD1L1	TRBV6-5
MADCAM1	TRBV6-6
MAEA	TRBV6-7
MAFK	TRBV6-8
MAGI2	TRBV7-1
MAGOHB	TRBV7-2
MALL	TRBV7-3
MALSU1	TRBV7-4
MAMDC4	TRBV7-6
MAN1B1	TRBV7-7
MAN2A2	TRBV7-9
MAN2B2	TRBV9
MANSC1	TRIAP1
[truncated: 1,805 more rows]

## Sheet: Affected Developmental Genes
Affected Developmental Tgenes
EPHB6
FGF12
FGF14
FGF22
FGF23
FGF6
FGFR3
FOXC1
FOXD4
FZD10
FZD9
GLI2
HOXA1
HOXA10
HOXA11
HOXA13
HOXA2
HOXA3
HOXA4
HOXA5
HOXA6
HOXA7
HOXA9
JAK2
LHX3
MAPK1
MSX1
NANOG
PAX6
RIC1
SHH
TBX1
WNT5B
WNT7A
ZIC1

## Sheet: Functional Categories
Category	# of Genes	total pathway hits =775, total genes 2202
Alzheimer disease-presenilin pathway (P00004)	14	1.80645
Angiogenesis (P00005)	22	2.83871
Apoptosis signaling pathway (P00006)	14	1.80645
CCKR signaling map (P06959)	18	2.32258
FGF signaling pathway (P00021)	20	2.58065
Gonadotropin-releasing hormone receptor pathway (P06664)	30	3.87097
Heterotrimeric G-protein signaling pathway (Gi and Gs alpha) (P00026)	25	3.22581
Heterotrimeric G-protein signaling pathway (Gq and Go alpha) (P00027)	19	2.45161
Huntington disease (P00029)	27	3.48387
Inflammation mediated by chemokine and cytokine signaling pathway (P00031)	27	3.48387
Integrin signalling pathway (P00034)	22	2.83871
PDGF signaling pathway (P00047)	15	1.93548
T cell activation (P00053)	15	1.93548
Wnt signaling pathway (P00057)	24	3.09677

## Sheet: occurances of each gene
genes	occurances, number of paitents with this gene affected
DMRT1	9
DMRT1	9
DMRT1	9
DMRT1	9
DMRT1	9
DMRT1	9
DMRT1	9
DMRT1	9
DMRT1	9
DMRT2	9
DMRT2	9
DMRT2	9
DMRT2	9
DMRT2	9
DMRT2	9
DMRT2	9
DMRT2	9
DMRT2	9
DMRT3	9
DMRT3	9
DMRT3	9
DMRT3	9
DMRT3	9
DMRT3	9
DMRT3	9
DMRT3	9
DMRT3	9
DOCK8	9
DOCK8	9
DOCK8	9
DOCK8	9
DOCK8	9
DOCK8	9
DOCK8	9
DOCK8	9
DOCK8	9
KANK1	9
KANK1	9
KANK1	9
KANK1	9
KANK1	9
KANK1	9
KANK1	9
KANK1	9
KANK1	9
SMARCA2	9
SMARCA2	9
SMARCA2	9
SMARCA2	9
SMARCA2	9
SMARCA2	9
SMARCA2	9
SMARCA2	9
SMARCA2	9
AK3	8
AK3	8
AK3	8
AK3	8
AK3	8
AK3	8
AK3	8
AK3	8
CBWD1	8
CBWD1	8
CBWD1	8
CBWD1	8
CBWD1	8
CBWD1	8
CBWD1	8
CBWD1	8
CD274	8
CD274	8
CD274	8
CD274	8
CD274	8
CD274	8
CD274	8
CD274	8
CDC37L1	8
CDC37L1	8
CDC37L1	8
CDC37L1	8
CDC37L1	8
CDC37L1	8
CDC37L1	8
CDC37L1	8
ERMP1	8
ERMP1	8
ERMP1	8
ERMP1	8
ERMP1	8
ERMP1	8
ERMP1	8
ERMP1	8
FOXD4	8
FOXD4	8
FOXD4	8
FOXD4	8
FOXD4	8
FOXD4	8
FOXD4	8
FOXD4	8
GLDC	8
GLDC	8
GLDC	8
GLDC	8
GLDC	8
GLDC	8
GLDC	8
GLDC	8
GLIS3	8
GLIS3	8
GLIS3	8
GLIS3	8
GLIS3	8
GLIS3	8
GLIS3	8
GLIS3	8
IL33	8
IL33	8
IL33	8
IL33	8
IL33	8
IL33	8
IL33	8
IL33	8
INSL4	8
INSL4	8
INSL4	8
INSL4	8
INSL4	8
INSL4	8
INSL4	8
INSL4	8
INSL6	8
INSL6	8
INSL6	8
INSL6	8
INSL6	8
INSL6	8
INSL6	8
INSL6	8
JAK2	8
JAK2	8
JAK2	8
JAK2	8
JAK2	8
JAK2	8
JAK2	8
JAK2	8
KCNV2	8
KCNV2	8
KCNV2	8
KCNV2	8
KCNV2	8
KCNV2	8
KCNV2	8
KCNV2	8
KDM4C	8
KDM4C	8
KDM4C	8
KDM4C	8
KDM4C	8
KDM4C	8
KDM4C	8
KDM4C	8
KIAA2026	8
KIAA2026	8
KIAA2026	8
KIAA2026	8
KIAA2026	8
KIAA2026	8
KIAA2026	8
KIAA2026	8
MLANA	8
MLANA	8
MLANA	8
MLANA	8
MLANA	8
MLANA	8
MLANA	8
MLANA	8
PDCD1LG2	8
PDCD1LG2	8
PDCD1LG2	8
PDCD1LG2	8
PDCD1LG2	8
PDCD1LG2	8
PDCD1LG2	8
PDCD1LG2	8
PLGRKT	8
PLGRKT	8
PLGRKT	8
PLGRKT	8
PLGRKT	8
PLGRKT	8
PLGRKT	8
PLGRKT	8
PTPRD	8
PTPRD	8
PTPRD	8
PTPRD	8
PTPRD	8
PTPRD	8
PTPRD	8
PTPRD	8
RANBP6	8
RANBP6	8
RANBP6	8
RANBP6	8
RANBP6	8
RANBP6	8
RANBP6	8
RANBP6	8
RCL1	8
RCL1	8
RCL1	8
RCL1	8
RCL1	8
RCL1	8
RCL1	8
RCL1	8
RFX3	8
RFX3	8
RFX3	8
RFX3	8
RFX3	8
RFX3	8
RFX3	8
RFX3	8
RLN1	8
RLN1	8
RLN1	8
RLN1	8
RLN1	8
RLN1	8
RLN1	8
RLN1	8
RLN2	8
RLN2	8
RLN2	8
RLN2	8
RLN2	8
RLN2	8
RLN2	8
RLN2	8
SLC1A1	8
SLC1A1	8
SLC1A1	8
SLC1A1	8
SLC1A1	8
SLC1A1	8
SLC1A1	8
SLC1A1	8
SPATA6L	8
SPATA6L	8
SPATA6L	8
SPATA6L	8
SPATA6L	8
SPATA6L	8
SPATA6L	8
SPATA6L	8
TPD52L3	8
TPD52L3	8
TPD52L3	8
TPD52L3	8
TPD52L3	8
TPD52L3	8
TPD52L3	8
TPD52L3	8
UHRF2	8
UHRF2	8
UHRF2	8
UHRF2	8
UHRF2	8
UHRF2	8
UHRF2	8
UHRF2	8
VLDLR	8
VLDLR	8
VLDLR	8
VLDLR	8
VLDLR	8
VLDLR	8
VLDLR	8
VLDLR	8
EFTUD2	7
EFTUD2	7
EFTUD2	7
EFTUD2	7
EFTUD2	7
EFTUD2	7
EFTUD2	7
IGLV10-54	7
IGLV10-54	7
IGLV10-54	7
IGLV10-54	7
IGLV10-54	7
IGLV10-54	7
IGLV10-54	7
IGLV11-55	7
IGLV11-55	7
IGLV11-55	7
IGLV11-55	7
IGLV11-55	7
IGLV11-55	7
IGLV11-55	7
IGLV1-36	7
IGLV1-36	7
IGLV1-36	7
IGLV1-36	7
IGLV1-36	7
IGLV1-36	7
IGLV1-36	7
IGLV1-40	7
IGLV1-40	7
IGLV1-40	7
IGLV1-40	7
IGLV1-40	7
IGLV1-40	7
IGLV1-40	7
IGLV1-44	7
IGLV1-44	7
IGLV1-44	7
IGLV1-44	7
IGLV1-44	7
IGLV1-44	7
IGLV1-44	7
IGLV1-47	7
IGLV1-47	7
IGLV1-47	7
IGLV1-47	7
IGLV1-47	7
IGLV1-47	7
IGLV1-47	7
IGLV1-50	7
IGLV1-50	7
IGLV1-50	7
IGLV1-50	7
IGLV1-50	7
IGLV1-50	7
IGLV1-50	7
IGLV1-51	7
IGLV1-51	7
IGLV1-51	7
IGLV1-51	7
IGLV1-51	7
IGLV1-51	7
IGLV1-51	7
IGLV2-33	7
IGLV2-33	7
IGLV2-33	7
IGLV2-33	7
IGLV2-33	7
IGLV2-33	7
IGLV2-33	7
IGLV3-32	7
IGLV3-32	7
IGLV3-32	7
IGLV3-32	7
IGLV3-32	7
IGLV3-32	7
IGLV3-32	7
IGLV4-60	7
IGLV4-60	7
IGLV4-60	7
IGLV4-60	7
IGLV4-60	7
IGLV4-60	7
IGLV4-60	7
IGLV4-69	7
IGLV4-69	7
IGLV4-69	7
IGLV4-69	7
IGLV4-69	7
IGLV4-69	7
IGLV4-69	7
IGLV5-37	7
IGLV5-37	7
IGLV5-37	7
IGLV5-37	7
IGLV5-37	7
IGLV5-37	7
IGLV5-37	7
IGLV5-45	7
IGLV5-45	7
IGLV5-45	7
IGLV5-45	7
IGLV5-45	7
IGLV5-45	7
IGLV5-45	7
IGLV5-48	7
IGLV5-48	7
IGLV5-48	7
IGLV5-48	7
IGLV5-48	7
IGLV5-48	7
IGLV5-48	7
IGLV5-52	7
IGLV5-52	7
IGLV5-52	7
IGLV5-52	7
IGLV5-52	7
IGLV5-52	7
IGLV5-52	7
IGLV6-57	7
IGLV6-57	7
IGLV6-57	7
IGLV6-57	7
IGLV6-57	7
IGLV6-57	7
IGLV6-57	7
IGLV7-43	7
IGLV7-43	7
IGLV7-43	7
IGLV7-43	7
IGLV7-43	7
IGLV7-43	7
IGLV7-43	7
IGLV7-46	7
IGLV7-46	7
IGLV7-46	7
IGLV7-46	7
IGLV7-46	7
IGLV7-46	7
IGLV7-46	7
IGLV8-61	7
IGLV8-61	7
IGLV8-61	7
IGLV8-61	7
IGLV8-61	7
IGLV8-61	7
IGLV8-61	7
IGLV9-49	7
IGLV9-49	7
IGLV9-49	7
IGLV9-49	7
IGLV9-49	7
IGLV9-49	7
IGLV9-49	7
MAPK1	7
MAPK1	7
MAPK1	7
MAPK1	7
MAPK1	7
MAPK1	7
MAPK1	7
PPM1F	7
PPM1F	7
PPM1F	7
PPM1F	7
PPM1F	7
PPM1F	7
PPM1F	7
PRAME	7
PRAME	7
PRAME	7
PRAME	7
PRAME	7
PRAME	7
PRAME	7
TOP3B	7
TOP3B	7
TOP3B	7
TOP3B	7
TOP3B	7
TOP3B	7
TOP3B	7
VPREB1	7
VPREB1	7
VPREB1	7
VPREB1	7
VPREB1	7
VPREB1	7
VPREB1	7
ZNF280A	7
ZNF280A	7
ZNF280A	7
ZNF280A	7
ZNF280A	7
ZNF280A	7
ZNF280A	7
ZNF280B	7
ZNF280B	7
ZNF280B	7
ZNF280B	7
ZNF280B	7
ZNF280B	7
ZNF280B	7
CCDC116	6
CCDC116	6
CCDC116	6
CCDC116	6
CCDC116	6
CCDC116	6
DOCK8-AS1	6
DOCK8-AS1	6
DOCK8-AS1	6
DOCK8-AS1	6
DOCK8-AS1	6
DOCK8-AS1	6
FAM246A	6
FAM246A	6
FAM246A	6
FAM246A	6
FAM246A	6
FAM246A	6
GGT2	6
GGT2	6
GGT2	6
GGT2	6
GGT2	6
GGT2	6
GGTLC2	6
GGTLC2	6
GGTLC2	6
GGTLC2	6
GGTLC2	6
GGTLC2	6
GNAZ	6
GNAZ	6
GNAZ	6
GNAZ	6
GNAZ	6
GNAZ	6
HIC2	6
HIC2	6
HIC2	6
HIC2	6
HIC2	6
HIC2	6
IGLC1	6
IGLC1	6
IGLC1	6
IGLC1	6
IGLC1	6
IGLC1	6
IGLC2	6
IGLC2	6
IGLC2	6
IGLC2	6
IGLC2	6
IGLC2	6
IGLC3	6
IGLC3	6
IGLC3	6
IGLC3	6
IGLC3	6
IGLC3	6
IGLC7	6
IGLC7	6
IGLC7	6
IGLC7	6
IGLC7	6
IGLC7	6
IGLJ1	6
IGLJ1	6
IGLJ1	6
IGLJ1	6
IGLJ1	6
IGLJ1	6
IGLJ2	6
IGLJ2	6
IGLJ2	6
IGLJ2	6
IGLJ2	6
IGLJ2	6
IGLJ3	6
IGLJ3	6
IGLJ3	6
IGLJ3	6
IGLJ3	6
IGLJ3	6
IGLJ4	6
IGLJ4	6
IGLJ4	6
IGLJ4	6
IGLJ4	6
IGLJ4	6
IGLJ5	6
IGLJ5	6
IGLJ5	6
IGLJ5	6
IGLJ5	6
IGLJ5	6
IGLJ6	6
IGLJ6	6
IGLJ6	6
IGLJ6	6
IGLJ6	6
IGLJ6	6
IGLJ7	6
IGLJ7	6
IGLJ7	6
IGLJ7	6
IGLJ7	6
IGLJ7	6
IGLL5	6
IGLL5	6
IGLL5	6
IGLL5	6
IGLL5	6
IGLL5	6
IGLV2-11	6
IGLV2-11	6
IGLV2-11	6
IGLV2-11	6
IGLV2-11	6
IGLV2-11	6
IGLV2-14	6
IGLV2-14	6
IGLV2-14	6
IGLV2-14	6
IGLV2-14	6
IGLV2-14	6
IGLV2-18	6
IGLV2-18	6
IGLV2-18	6
IGLV2-18	6
IGLV2-18	6
IGLV2-18	6
IGLV2-23	6
IGLV2-23	6
IGLV2-23	6
IGLV2-23	6
IGLV2-23	6
IGLV2-23	6
IGLV2-8	6
IGLV2-8	6
IGLV2-8	6
IGLV2-8	6
IGLV2-8	6
IGLV2-8	6
IGLV3-1	6
IGLV3-1	6
IGLV3-1	6
IGLV3-1	6
IGLV3-1	6
IGLV3-1	6
IGLV3-10	6
IGLV3-10	6
IGLV3-10	6
IGLV3-10	6
IGLV3-10	6
IGLV3-10	6
IGLV3-12	6
IGLV3-12	6
IGLV3-12	6
IGLV3-12	6
IGLV3-12	6
IGLV3-12	6
IGLV3-16	6
IGLV3-16	6
IGLV3-16	6
IGLV3-16	6
IGLV3-16	6
IGLV3-16	6
IGLV3-19	6
IGLV3-19	6
IGLV3-19	6
IGLV3-19	6
IGLV3-19	6
IGLV3-19	6
IGLV3-21	6
IGLV3-21	6
IGLV3-21	6
IGLV3-21	6
IGLV3-21	6
IGLV3-21	6
IGLV3-22	6
IGLV3-22	6
IGLV3-22	6
IGLV3-22	6
IGLV3-22	6
IGLV3-22	6
IGLV3-25	6
IGLV3-25	6
IGLV3-25	6
IGLV3-25	6
IGLV3-25	6
IGLV3-25	6
IGLV3-27	6
IGLV3-27	6
IGLV3-27	6
IGLV3-27	6
IGLV3-27	6
IGLV3-27	6
IGLV3-9	6
IGLV3-9	6
IGLV3-9	6
IGLV3-9	6
IGLV3-9	6
IGLV3-9	6
IGLV4-3	6
IGLV4-3	6
IGLV4-3	6
IGLV4-3	6
IGLV4-3	6
IGLV4-3	6
PPIL2	6
PPIL2	6
PPIL2	6
PPIL2	6
PPIL2	6
PPIL2	6
RIMBP3B	6
RIMBP3B	6
RIMBP3B	6
RIMBP3B	6
RIMBP3B	6
RIMBP3B	6
RIMBP3C	6
RIMBP3C	6
RIMBP3C	6
RIMBP3C	6
RIMBP3C	6
RIMBP3C	6
RSPH14	6
RSPH14	6
RSPH14	6
RSPH14	6
RSPH14	6
RSPH14	6
SDF2L1	6
SDF2L1	6
SDF2L1	6
SDF2L1	6
SDF2L1	6
SDF2L1	6
SHH	6
shh	6
SHH	6
SHH	6
SHH	6
SHH	6
TMEM191C	6
TMEM191C	6
TMEM191C	6
TMEM191C	6
TMEM191C	6
TMEM191C	6
UBE2L3	6
UBE2L3	6
UBE2L3	6
UBE2L3	6
UBE2L3	6
UBE2L3	6
YDJC	6
YDJC	6
YDJC	6
YDJC	6
YDJC	6
YDJC	6
YPEL1	6
YPEL1	6
YPEL1	6
YPEL1	6
YPEL1	6
YPEL1	6
ADORA2A	5
ADORA2A	5
ADORA2A	5
ADORA2A	5
ADORA2A	5
AIFM3	5
AIFM3	5
AIFM3	5
AIFM3	5
AIFM3	5
ARVCF	5
ARVCF	5
ARVCF	5
ARVCF	5
ARVCF	5
ATP6V1E1	5
ATP6V1E1	5
ATP6V1E1	5
ATP6V1E1	5
ATP6V1E1	5
BCL2L13	5
BCL2L13	5
BCL2L13	5
BCL2L13	5
BCL2L13	5
BCR	5
BCR	5
BCR	5
BCR	5
BCR	5
BID	5
BID	5
BID	5
BID	5
BID	5
BLACE	5
BLACE	5
BLACE	5
BLACE	5
BLACE	5
C22orf15	5
C22orf15	5
C22orf15	5
C22orf15	5
C22orf15	5
C22orf39	5
C22orf39	5
C22orf39	5
C22orf39	5
C22orf39	5
CABIN1	5
CABIN1	5
CABIN1	5
CABIN1	5
CABIN1	5
CCDC188	5
CCDC188	5
CCDC188	5
CCDC188	5
CCDC188	5
CDC45	5
CDC45	5
CDC45	5
CDC45	5
CDC45	5
CECR2	5
CECR2	5
CECR2	5
CECR2	5
CECR2	5
CHCHD10	5
CHCHD10	5
CHCHD10	5
CHCHD10	5
CHCHD10	5
CLDN5	5
CLDN5	5
CLDN5	5
CLDN5	5
CLDN5	5
CLTCL1	5
CLTCL1	5
CLTCL1	5
CLTCL1	5
CLTCL1	5
CNPY1	5
CNPY1	5
CNPY1	5
CNPY1	5
CNPY1	5
COMT	5
COMT	5
COMT	5
COMT	5
COMT	5
CRKL	5
CRKL	5
CRKL	5
CRKL	5
CRKL	5
CRYBB2	5
CRYBB2	5
CRYBB2	5
CRYBB2	5
CRYBB2	5
CRYBB3	5
CRYBB3	5
CRYBB3	5
CRYBB3	5
CRYBB3	5
DDT	5
DDT	5
DDT	5
DDT	5
DDT	5
DDTL	5
DDTL	5
DDTL	5
DDTL	5
DDTL	5
DERL3	5
DERL3	5
DERL3	5
DERL3	5
DERL3	5
DGCR2	5
DGCR2	5
DGCR2	5
DGCR2	5
DGCR2	5
DGCR6	5
DGCR6	5
DGCR6	5
DGCR6	5
DGCR6	5
DGCR6L	5
DGCR6L	5
DGCR6L	5
DGCR6L	5
DGCR6L	5
DGCR8	5
DGCR8	5
DGCR8	5
DGCR8	5
DGCR8	5
DMAC1	5
DMAC1	5
DMAC1	5
DMAC1	5
DMAC1	5
DPP6	5
DPP6	5
DPP6	5
DPP6	5
DPP6	5
DRICH1	5
DRICH1	5
DRICH1	5
DRICH1	5
DRICH1	5
EN2	5
EN2	5
EN2	5
EN2	5
EN2	5
ESS2	5
ESS2	5
ESS2	5
ESS2	5
ESS2	5
FAM230G	5
FAM230G	5
FAM230G	5
FAM230G	5
FAM230G	5
FAM246B	5
FAM246B	5
FAM246B	5
FAM246B	5
FAM246B	5
FAM246C	5
FAM246C	5
FAM246C	5
FAM246C	5
FAM246C	5
GGT1	5
GGT1	5
GGT1	5
GGT1	5
GGT1	5
GGT5	5
GGT5	5
GGT5	5
GGT5	5
GGT5	5
GGTLC3	5
GGTLC3	5
GGTLC3	5
GGTLC3	5
GGTLC3	5
GNB1L	5
GNB1L	5
GNB1L	5
GNB1L	5
GNB1L	5
GP1BB	5
GP1BB	5
GP1BB	5
GP1BB	5
GP1BB	5
GRK3	5
GRK3	5
GRK3	5
GRK3	5
GRK3	5
GSC2	5
GSC2	5
GSC2	5
GSC2	5
GSC2	5
GSTT2	5
GSTT2	5
GSTT2	5
GSTT2	5
GSTT2	5
GSTT2B	5
GSTT2B	5
GSTT2B	5
GSTT2B	5
GSTT2B	5
GSTT4	5
GSTT4	5
GSTT4	5
GSTT4	5
GSTT4	5
GUCD1	5
GUCD1	5
GUCD1	5
GUCD1	5
GUCD1	5
HIRA	5
HIRA	5
HIRA	5
HIRA	5
HIRA	5
HTR5A	5
HTR5A	5
HTR5A	5
HTR5A	5
HTR5A	5
HTR5A-AS1	5
HTR5A-AS1	5
HTR5A-AS1	5
HTR5A-AS1	5
HTR5A-AS1	5
IGLL1	5
IGLL1	5
IGLL1	5
IGLL1	5
IGLL1	5
INSIG1	5
INSIG1	5
INSIG1	5
INSIG1	5
INSIG1	5
KIAA1671	5
KIAA1671	5
KIAA1671	5
KIAA1671	5
KIAA1671	5
KLHL22	5
KLHL22	5
KLHL22	5
KLHL22	5
KLHL22	5
LRP5L	5
LRP5L	5
LRP5L	5
LRP5L	5
LRP5L	5
LRRC74B	5
LRRC74B	5
LRRC74B	5
LRRC74B	5
LRRC74B	5
LRRC75B	5
LRRC75B	5
LRRC75B	5
LRRC75B	5
LRRC75B	5
LURAP1L	5
LURAP1L	5
LURAP1L	5
LURAP1L	5
LURAP1L	5
LZTR1	5
LZTR1	5
LZTR1	5
LZTR1	5
LZTR1	5
MED15	5
MED15	5
MED15	5
MED15	5
MED15	5
MICAL3	5
MICAL3	5
MICAL3	5
MICAL3	5
MICAL3	5
MIF	5
MIF	5
MIF	5
MIF	5
MIF	5
MMP11	5
MMP11	5
MMP11	5
MMP11	5
MMP11	5
MPDZ	5
MPDZ	5
MPDZ	5
MPDZ	5
MPDZ	5
MRPL40	5
MRPL40	5
MRPL40	5
MRPL40	5
MRPL40	5
NFIB	5
NFIB	5
NFIB	5
NFIB	5
NFIB	5
P2RX6	5
P2RX6	5
P2RX6	5
P2RX6	5
P2RX6	5
PAXIP1	5
PAXIP1	5
PAXIP1	5
PAXIP1	5
PAXIP1	5
PAXIP1-AS2	5
PAXIP1-AS2	5
PAXIP1-AS2	5
PAXIP1-AS2	5
PAXIP1-AS2	5
PEX26	5
PEX26	5
PEX26	5
PEX26	5
PEX26	5
PI4KA	5
PI4KA	5
PI4KA	5
PI4KA	5
PI4KA	5
PIWIL3	5
PIWIL3	5
PIWIL3	5
PIWIL3	5
PIWIL3	5
PLPP6	5
PLPP6	5
PLPP6	5
PLPP6	5
PLPP6	5
POM121L7P	5
POM121L7P	5
POM121L7P	5
POM121L7P	5
POM121L7P	5
PRODH	5
PRODH	5
PRODH	5
PRODH	5
PRODH	5
PUM3	5
PUM3	5
PUM3	5
PUM3	5
PUM3	5
RAB36	5
RAB36	5
RAB36	5
RAB36	5
RAB36	5
RANBP1	5
RANBP1	5
RANBP1	5
RANBP1	5
RANBP1	5
RBM33	5
RBM33	5
RBM33	5
RBM33	5
RBM33	5
RGL4	5
RGL4	5
RGL4	5
RGL4	5
RGL4	5
RIC1	5
RIC1	5
RIC1	5
RIC1	5
RIC1	5
RIMBP3	5
RIMBP3	5
RIMBP3	5
RIMBP3	5
RIMBP3	5
RTL10	5
RTL10	5
RTL10	5
RTL10	5
RTL10	5
RTN4R	5
RTN4R	5
RTN4R	5
RTN4R	5
RTN4R	5
SCARF2	5
SCARF2	5
SCARF2	5
SCARF2	5
SCARF2	5
SEPTIN5	5
SEPTIN5	5
SEPTIN5	5
SEPTIN5	5
SEPTIN5	5
SERPIND1	5
SERPIND1	5
SERPIND1	5
SERPIND1	5
SERPIND1	5
SGSM1	5
SGSM1	5
SGSM1	5
SGSM1	5
SGSM1	5
SLC25A1	5
SLC25A1	5
SLC25A1	5
SLC25A1	5
SLC25A1	5
SLC25A18	5
SLC25A18	5
SLC25A18	5
SLC25A18	5
SLC25A18	5
SLC2A11	5
SLC2A11	5
SLC2A11	5
SLC2A11	5
SLC2A11	5
SLC7A4	5
SLC7A4	5
SLC7A4	5
SLC7A4	5
SLC7A4	5
SMARCB1	5
SMARCB1	5
SMARCB1	5
SMARCB1	5
SMARCB1	5
SNAP29	5
SNAP29	5
SNAP29	5
SNAP29	5
SNAP29	5
SNRPD3	5
SNRPD3	5
SNRPD3	5
SNRPD3	5
SNRPD3	5
SPECC1L	5
SPECC1L	5
SPECC1L	5
SPECC1L	5
SPECC1L	5
SPECC1L-ADORA2A	5
SPECC1L-ADORA2A	5
SPECC1L-ADORA2A	5
SPECC1L-ADORA2A	5
SPECC1L-ADORA2A	5
SUSD2	5
SUSD2	5
SUSD2	5
SUSD2	5
SUSD2	5
TANGO2	5
TANGO2	5
TANGO2	5
TANGO2	5
TANGO2	5
TBX1	5
TBX1	5
TBX1	5
TBX1	5
TBX1	5
THAP7	5
THAP7	5
THAP7	5
THAP7	5
THAP7	5
TMEM191B	5
TMEM191B	5
TMEM191B	5
TMEM191B	5
TMEM191B	5
TMEM211	5
TMEM211	5
TMEM211	5
TMEM211	5
TMEM211	5
TRMT2A	5
TRMT2A	5
TRMT2A	5
TRMT2A	5
TRMT2A	5
TSSK2	5
TSSK2	5
TSSK2	5
TSSK2	5
TSSK2	5
TUBA8	5
TUBA8	5
TUBA8	5
TUBA8	5
TUBA8	5
TXNRD2	5
TXNRD2	5
TXNRD2	5
TXNRD2	5
TXNRD2	5
TYRP1	5
TYRP1	5
TYRP1	5
TYRP1	5
TYRP1	5
UFD1	5
UFD1	5
UFD1	5
UFD1	5
UFD1	5
UPB1	5
UPB1	5
UPB1	5
UPB1	5
UPB1	5
USP18	5
USP18	5
USP18	5
USP18	5
USP18	5
USP41	5
USP41	5
USP41	5
USP41	5
USP41	5
VPREB3	5
VPREB3	5
VPREB3	5
VPREB3	5
VPREB3	5
WASHC1	5
WASHC1	5
WASHC1	5
WASHC1	5
WASHC1	5
ZDHHC8	5
ZDHHC8	5
ZDHHC8	5
ZDHHC8	5
ZDHHC8	5
ZNF70	5
ZNF70	5
ZNF70	5
ZNF70	5
ZNF70	5
ZNF74	5
ZNF74	5
ZNF74	5
ZNF74	5
ZNF74	5
ABCB8	4
ABCB8	4
ABCB8	4
ABCB8	4
ABCF2	4
ABCF2	4
ABCF2	4
ABCF2	4
ABCF2-H2BE1	4
ABCF2-H2BE1	4
ABCF2-H2BE1	4
ABCF2-H2BE1	4
ACTR3B	4
ACTR3B	4
ACTR3B	4
ACTR3B	4
ACTR3C	4
ACTR3C	4
ACTR3C	4
ACTR3C	4
ADCYAP1	4
ADCYAP1	4
ADCYAP1	4
ADCYAP1	4
AGAP3	4
AGAP3	4
AGAP3	4
AGAP3	4
AKAIN1	4
AKAIN1	4
AKAIN1	4
AKAIN1	4
AOC1	4
AOC1	4
AOC1	4
AOC1	4
ARHGAP28	4
ARHGAP28	4
ARHGAP28	4
ARHGAP28	4
ASB10	4
ASB10	4
ASB10	4
ASB10	4
ASIC3	4
ASIC3	4
ASIC3	4
ASIC3	4
ATG9B	4
ATG9B	4
ATG9B	4
ATG9B	4
ATP6V0E2	4
ATP6V0E2	4
ATP6V0E2	4
ATP6V0E2	4
C7orf33	4
C7orf33	4
C7orf33	4
C7orf33	4
CDK5	4
CDK5	4
CDK5	4
CDK5	4
CER1	4
CER1	4
CER1	4
CER1	4
CETN1	4
CETN1	4
CETN1	4
CETN1	4
CHPF2	4
CHPF2	4
CHPF2	4
CHPF2	4
CLUL1	4
CLUL1	4
CLUL1	4
CLUL1	4
CNTNAP2	4
CNTNAP2	4
CNTNAP2	4
CNTNAP2	4
COLEC12	4
COLEC12	4
COLEC12	4
COLEC12	4
CRYGN	4
CRYGN	4
CRYGN	4
CRYGN	4
CUL1	4
CUL1	4
CUL1	4
CUL1	4
DLGAP1	4
DLGAP1	4
DLGAP1	4
DLGAP1	4
DNAJB6	4
DNAJB6	4
DNAJB6	4
DNAJB6	4
DYNC2I1	4
DYNC2I1	4
DYNC2I1	4
DYNC2I1	4
EMILIN2	4
EMILIN2	4
EMILIN2	4
EMILIN2	4
ENOSF1	4
ENOSF1	4
ENOSF1	4
ENOSF1	4
EPB41L3	4
EPB41L3	4
EPB41L3	4
EPB41L3	4
ESYT2	4
ESYT2	4
ESYT2	4
ESYT2	4
EZH2	4
EZH2	4
EZH2	4
EZH2	4
FASTK	4
FASTK	4
FASTK	4
FASTK	4
FREM1	4
FREM1	4
FREM1	4
FREM1	4
GALNT11	4
GALNT11	4
GALNT11	4
GALNT11	4
GALNTL5	4
GALNTL5	4
GALNTL5	4
GALNTL5	4
GBX1	4
GBX1	4
GBX1	4
GBX1	4
GIMAP1	4
GIMAP1	4
GIMAP1	4
GIMAP1	4
GIMAP1-GIMAP5	4
GIMAP1-GIMAP5	4
GIMAP1-GIMAP5	4
GIMAP1-GIMAP5	4
GIMAP2	4
GIMAP2	4
GIMAP2	4
GIMAP2	4
GIMAP4	4
GIMAP4	4
GIMAP4	4
GIMAP4	4
GIMAP5	4
GIMAP5	4
GIMAP5	4
GIMAP5	4
GIMAP6	4
GIMAP6	4
GIMAP6	4
GIMAP6	4
GIMAP7	4
GIMAP7	4
GIMAP7	4
GIMAP7	4
GIMAP8	4
GIMAP8	4
GIMAP8	4
GIMAP8	4
H2BE1	4
H2BE1	4
H2BE1	4
H2BE1	4
IQCA1L	4
IQCA1L	4
IQCA1L	4
IQCA1L	4
KCNH2	4
KCNH2	4
KCNH2	4
KCNH2	4
KMT2C	4
KMT2C	4
KMT2C	4
KMT2C	4
KRBA1	4
KRBA1	4
KRBA1	4
KRBA1	4
L3MBTL4	4
L3MBTL4	4
L3MBTL4	4
L3MBTL4	4
LAMA1	4
LAMA1	4
LAMA1	4
LAMA1	4
LINC01387	4
LINC01387	4
LINC01387	4
LINC01387	4
LMBR1	4
LMBR1	4
LMBR1	4
LMBR1	4
LPIN2	4
LPIN2	4
LPIN2	4
LPIN2	4
LRRC61	4
LRRC61	4
LRRC61	4
LRRC61	4
METTL4	4
METTL4	4
METTL4	4
METTL4	4
MNX1	4
MNX1	4
MNX1	4
MNX1	4
MYL12A	4
MYL12A	4
MYL12A	4
MYL12A	4
MYL12B	4
MYL12B	4
MYL12B	4
MYL12B	4
MYOM1	4
MYOM1	4
MYOM1	4
MYOM1	4
NCAPG2	4
NCAPG2	4
NCAPG2	4
NCAPG2	4
NDC80	4
NDC80	4
NDC80	4
NDC80	4
NOM1	4
NOM1	4
NOM1	4
NOM1	4
NOS3	4
NOS3	4
NOS3	4
NOS3	4
NUB1	4
NUB1	4
NUB1	4
NUB1	4
PDIA4	4
PDIA4	4
PDIA4	4
PDIA4	4
PRKAG2	4
PRKAG2	4
PRKAG2	4
PRKAG2	4
PSIP1	4
PSIP1	4
PSIP1	4
PSIP1	4
PTPRN2	4
PTPRN2	4
PTPRN2	4
PTPRN2	4
RARRES2	4
RARRES2	4
RARRES2	4
RARRES2	4
REPIN1	4
REPIN1	4
REPIN1	4
REPIN1	4
RHEB	4
RHEB	4
RHEB	4
RHEB	4
RNF32	4
RNF32	4
RNF32	4
RNF32	4
SLC4A2	4
SLC4A2	4
SLC4A2	4
SLC4A2	4
SMARCD3	4
SMARCD3	4
SMARCD3	4
SMARCD3	4
SMCHD1	4
SMCHD1	4
SMCHD1	4
SMCHD1	4
SNAPC3	4
SNAPC3	4
SNAPC3	4
SNAPC3	4
TGIF1	4
TGIF1	4
TGIF1	4
TGIF1	4
THOC1	4
THOC1	4
THOC1	4
THOC1	4
TMEM176A	4
TMEM176A	4
TMEM176A	4
TMEM176A	4
TMEM176B	4
TMEM176B	4
TMEM176B	4
TMEM176B	4
TMEM200C	4
TMEM200C	4
TMEM200C	4
TMEM200C	4
TMUB1	4
TMUB1	4
TMUB1	4
TMUB1	4
TTC39B	4
TTC39B	4
TTC39B	4
TTC39B	4
TYMS	4
TYMS	4
TYMS	4
TYMS	4
TYMSOS	4
TYMSOS	4
TYMSOS	4
TYMSOS	4
UBE3C	4
UBE3C	4
UBE3C	4
UBE3C	4
USP14	4
USP14	4
USP14	4
USP14	4
USP9X	4
USP9X	4
USP9X	4
USP9X	4
VIPR2	4
VIPR2	4
VIPR2	4
VIPR2	4
WDR86	4
WDR86	4
WDR86	4
WDR86	4
XRCC2	4
XRCC2	4
XRCC2	4
XRCC2	4
YES1	4
YES1	4
YES1	4
YES1	4
ZBED6CL	4
ZBED6CL	4
ZBED6CL	4
ZBED6CL	4
ZBTB14	4
ZBTB14	4
ZBTB14	4
ZBTB14	4
ZDHHC21	4
ZDHHC21	4
ZDHHC21	4
ZDHHC21	4
ZNF212	4
ZNF212	4
ZNF212	4
ZNF212	4
ZNF282	4
ZNF282	4
ZNF282	4
ZNF282	4
ZNF398	4
ZNF398	4
ZNF398	4
ZNF398	4
ZNF425	4
ZNF425	4
ZNF425	4
ZNF425	4
ZNF467	4
ZNF467	4
ZNF467	4
ZNF467	4
ZNF746	4
ZNF746	4
ZNF746	4
ZNF746	4
ZNF775	4
ZNF775	4
ZNF775	4
ZNF775	4
ZNF777	4
ZNF777	4
ZNF777	4
ZNF777	4
ZNF783	4
ZNF783	4
ZNF783	4
ZNF783	4
ZNF786	4
ZNF786	4
ZNF786	4
ZNF786	4
ZNF862	4
ZNF862	4
ZNF862	4
ZNF862	4
ACER2	3
ACER2	3
ACER2	3
ADAMTSL1	3
ADAMTSL1	3
ADAMTSL1	3
AFG3L2	3
AFG3L2	3
AFG3L2	3
ANKRD12	3
ANKRD12	3
ANKRD12	3
ANKRD30B	3
ANKRD30B	3
ANKRD30B	3
ANKRD62	3
ANKRD62	3
ANKRD62	3
APCDD1	3
APCDD1	3
APCDD1	3
BNC2	3
BNC2	3
BNC2	3
C9orf92	3
C9orf92	3
C9orf92	3
CCDC171	3
CCDC171	3
CCDC171	3
CEP192	3
CEP192	3
CEP192	3
CEP76	3
CEP76	3
CEP76	3
CHMP1B	3
CHMP1B	3
CHMP1B	3
CIDEA	3
CIDEA	3
CIDEA	3
CNTLN	3
CNTLN	3
CNTLN	3
DENND4C	3
DENND4C	3
DENND4C	3
FAM210A	3
FAM210A	3
FAM210A	3
GNAL	3
GNAL	3
GNAL	3
HAUS6	3
HAUS6	3
HAUS6	3
HSBP1L1	3
HSBP1L1	3
HSBP1L1	3
IMPA2	3
IMPA2	3
IMPA2	3
KIAA0020	3
KIAA0020	3
KIAA0020	3
KIAA1432	3
KIAA1432	3
KIAA1432	3
LDLRAD4	3
LDLRAD4	3
LDLRAD4	3
LRRC30	3
LRRC30	3
LRRC30	3
MC2R	3
MC2R	3
MC2R	3
MC5R	3
MC5R	3
MC5R	3
MPPE1	3
MPPE1	3
MPPE1	3
MTCL1	3
MTCL1	3
MTCL1	3
NAPG	3
NAPG	3
NAPG	3
NDUFV2	3
NDUFV2	3
NDUFV2	3
PIEZO2	3
PIEZO2	3
PIEZO2	3
PLIN2	3
PLIN2	3
PLIN2	3
POTEC	3
POTEC	3
POTEC	3
PPAPDC2	3
PPAPDC2	3
PPAPDC2	3
PPP4R1	3
PPP4R1	3
PPP4R1	3
PRELID3A	3
PRELID3A	3
PRELID3A	3
PSMG2	3
PSMG2	3
PSMG2	3
PTPN2	3
PTPN2	3
PTPN2	3
PTPRM	3
PTPRM	3
PTPRM	3
RAB12	3
RAB12	3
RAB12	3
RAB31	3
RAB31	3
RAB31	3
RALBP1	3
RALBP1	3
RALBP1	3
RBFA	3
RBFA	3
RBFA	3
RNMT	3
RNMT	3
RNMT	3
RPS6	3
RPS6	3
RPS6	3
RRAGA	3
RRAGA	3
RRAGA	3
SEH1L	3
SEH1L	3
SEH1L	3
SH3GL2	3
SH3GL2	3
SH3GL2	3
SLC24A2	3
SLC24A2	3
SLC24A2	3
SLC35G4	3
SLC35G4	3
SLC35G4	3
SPIRE1	3
SPIRE1	3
SPIRE1	3
TMEM261	3
TMEM261	3
TMEM261	3
TUBB6	3
TUBB6	3
TUBB6	3
TUBB8B	3
TUBB8B	3
TUBB8B	3
TWSG1	3
TWSG1	3
TWSG1	3
TXNDC2	3
TXNDC2	3
TXNDC2	3
VAPA	3
VAPA	3
VAPA	3
ZNF519	3
ZNF519	3
ZNF519	3
ADNP2	2
ADNP2	2
ATP9B	2
ATP9B	2
C1GALT1	2
C1GALT1	2
chd7	2
chd7	2
COL28A1	2
COL28A1	2
CTDP1	2
CTDP1	2
CTNND1	2
CTNND1	2
EP300	2
EP300	2
GALR1	2
GALR1	2
GLCCI1	2
GLCCI1	2
GPC5	2
GPC5	2
ICA1	2
ICA1	2
ITGB8	2
ITGB8	2
KCNG2	2
KCNG2	2
MBP	2
MBP	2
MIOS	2
MIOS	2
NFATC1	2
NFATC1	2
NXPH1	2
NXPH1	2
PARD6G	2
PARD6G	2
POLR1A	2
POLR1A	2
RPA3	2
[truncated: 2,091 more rows]

## Sheet: greater than 8 patients
Gene affected in 8+ patients
DMRT1
DMRT2
DMRT3
DOCK8
KANK1
SMARCA2
AK3
CBWD1
CD274
CDC37L1
ERMP1
FOXD4
GLDC
GLIS3
IL33
INSL4
INSL6
JAK2
KCNV2
KDM4C
KIAA2026
MLANA
PDCD1LG2
PLGRKT
PTPRD
RANBP6
RCL1
RFX3
RLN1
RLN2
SLC1A1
SPATA6L
TPD52L3
UHRF2
VLDLR
